# Supplementary material for: The choice of the DNA extraction method may influence the outcome of the soil microbial community structure analysis
Source: PubMed Central journal article supplement (PMC5552907; doi:10.1002/mbo3.453), 2017-02-20
Supplement: MBO3-6-na-s001.pdf [file MBO3-6-na-s001.pdf]

**Supplementary Table 1.** User evaluation of the DNA extraction kits according to the convenience of their use, the time spent on extraction and cost per sample. Ranked in the range from 1 to 8. 1 – the best in the category, 8 – the last in the category.

| <b>Kit ID</b> | <b>Extraction type</b> | <b>Time-consuming</b> | <b>Userfriendly</b> | <b>Cost (per sample)</b> | <b>Avarege mark</b> | <b>Final place</b> |
|---------------|------------------------|-----------------------|---------------------|--------------------------|---------------------|--------------------|
| C1            | Indirect               | 7                     | 8                   | 1                        | 5.33                | 7                  |
| <b>C2</b>     | <b>Direct</b>          | <b>1</b>              | <b>1</b>            | <b>6</b>                 | <b>2.67</b>         | <b>1</b>           |
| <b>C3</b>     | <b>Direct</b>          | <b>2</b>              | <b>2</b>            | <b>4</b>                 | <b>2.67</b>         | <b>1</b>           |
| C4            | Indirect               | 8                     | 7                   | 8                        | 7.67                | 8                  |
| C5            | Direct                 | 3                     | 3                   | 7                        | 4.33                | 4                  |
| C6            | Direct                 | 5                     | 5                   | 5                        | 5.00                | 5                  |
| <b>C7</b>     | <b>Direct</b>          | <b>4</b>              | <b>4</b>            | <b>2</b>                 | <b>3.33</b>         | <b>3</b>           |
| C8            | Direct                 | 6                     | 6                   | 3                        | 5.00                | 5                  |
