# Supplementary material for: The choice of the DNA extraction method may influence the outcome of the soil microbial community structure analysis
Source: PubMed Central journal article supplement (PMC5552907; doi:10.1002/mbo3.453), 2017-02-20
Supplement: MBO3-6-na-s002.pdf [file MBO3-6-na-s002.pdf]

Supplementary Table 2. Detailed taxonomic analyses at different ranks with data obtained with the tested kits. The table shows the relative abundance of microbial 16S rDNA sequences for each tested kit, at different taxonomic levels.

| Kingdom  | Phylum         | Class                | Order              | Family              | Genus                     | C1    | C2    | C3    | C4    | C5    | C6    | C7    | C8    | C6.1  | C6.2  |
|----------|----------------|----------------------|--------------------|---------------------|---------------------------|-------|-------|-------|-------|-------|-------|-------|-------|-------|-------|
| Archaea  | Crenarchaeota  | Thaumarchaeota       | Nitrososphaerales  | Nitrososphaeraeae   | Candidatus Nitrososphaera | 0,00% | 0,03% | 0,01% | 0,01% | 0,01% | 0,00% | 0,00% | 0,00% | 0,00% | 0,01% |
| Archaea  | Euryarchaeota  | Methanobacteria      | Methanobacteriales | Methanobacteriaceae | Methanobacterium          | 0,00% | 0,00% | 0,00% | 0,00% | 0,00% | 0,00% | 0,00% | 0,01% | 0,00% | 0,00% |
| Archaea  | Euryarchaeota  | Methanomicrobia      | Methanosarcinales  | Methanosarcinaceae  | Methanosarcina            | 0,00% | 0,00% | 0,00% | 0,00% | 0,00% | 0,00% | 0,00% | 0,00% | 0,00% | 0,00% |
| Bacteria | AD3            | ABS-6                |                    |                     |                           | 0,00% | 0,01% | 0,00% | 0,01% | 0,00% | 0,00% | 0,00% | 0,00% | 0,00% | 0,00% |
| Bacteria | Acidobacteria  | Acidobacteria-5      |                    |                     |                           | 0,00% | 0,03% | 0,02% | 0,01% | 0,02% | 0,02% | 0,02% | 0,00% | 0,02% | 0,02% |
| Bacteria | Acidobacteria  | Acidobacteria-6      | CCU21              |                     |                           | 0,00% | 0,03% | 0,02% | 0,02% | 0,04% | 0,02% | 0,03% | 0,01% | 0,02% | 0,03% |
| Bacteria | Acidobacteria  | Acidobacteria-6      | iii1-15            |                     |                           | 0,00% | 1,31% | 1,10% | 1,52% | 1,54% | 1,14% | 0,96% | 0,97% | 1,03% | 1,28% |
| Bacteria | Acidobacteria  | Acidobacteria-6      | iii1-15            | RB40                |                           | 0,00% | 0,11% | 0,12% | 0,20% | 0,12% | 0,14% | 0,09% | 0,06% | 0,11% | 0,17% |
| Bacteria | Acidobacteria  | Acidobacteria-6      | iii1-15            | mb2424              |                           | 0,00% | 0,04% | 0,04% | 0,21% | 0,04% | 0,04% | 0,04% | 0,15% | 0,03% | 0,06% |
| Bacteria | Acidobacteria  | Acidobacteriia       | Acidobacteriales   | Acidobacteriaceae   |                           | 0,00% | 3,28% | 3,77% | 0,49% | 3,26% | 3,79% | 3,67% | 0,66% | 3,49% | 4,15% |
| Bacteria | Acidobacteria  | Acidobacteriia       | Acidobacteriales   | Acidobacteriaceae   | Edaphobacter              | 0,00% | 0,10% | 0,20% | 0,04% | 0,12% | 0,17% | 0,21% | 0,08% | 0,16% | 0,18% |
| Bacteria | Acidobacteria  | Acidobacteriia       | Acidobacteriales   | Acidobacteriaceae   | Terriglobus               | 0,00% | 0,02% | 0,01% | 0,00% | 0,01% | 0,01% | 0,01% | 0,00% | 0,02% | 0,01% |
| Bacteria | Acidobacteria  | Acidobacteriia       | Acidobacteriales   | Koribacteraceae     |                           | 0,00% | 1,39% | 1,35% | 0,20% | 1,37% | 1,42% | 1,12% | 0,28% | 1,42% | 1,42% |
| Bacteria | Acidobacteria  | Acidobacteriia       | Acidobacteriales   | Koribacteraceae     | Candidatus Koribacter     | 0,00% | 0,17% | 0,17% | 0,03% | 0,19% | 0,19% | 0,19% | 0,00% | 0,18% | 0,19% |
| Bacteria | Acidobacteria  | DA052                | Ellin6513          |                     |                           | 0,00% | 0,20% | 0,17% | 0,01% | 0,18% | 0,21% | 0,19% | 0,02% | 0,22% | 0,20% |
| Bacteria | Acidobacteria  | EC1113               |                    |                     |                           | 0,00% | 0,00% | 0,00% | 0,00% | 0,00% | 0,00% | 0,00% | 0,00% | 0,00% | 0,00% |
| Bacteria | Acidobacteria  | Solibacteres         | Solibacterales     |                     |                           | 0,00% | 1,25% | 1,21% | 0,20% | 1,37% | 1,42% | 1,36% | 0,19% | 1,35% | 1,51% |
| Bacteria | Acidobacteria  | Solibacteres         | Solibacterales     | Solibacteraceae     |                           | 0,00% | 0,70% | 1,21% | 0,10% | 0,94% | 0,78% | 0,60% | 0,23% | 0,68% | 0,91% |
| Bacteria | Acidobacteria  | Solibacteres         | Solibacterales     | Solibacteraceae     | Candidatus Solibacter     | 0,00% | 0,87% | 0,93% | 0,22% | 0,93% | 0,89% | 0,77% | 0,15% | 0,81% | 0,99% |
| Bacteria | Acidobacteria  | Solibacteres         | Solibacterales     | [Bryobacteraceae]   |                           | 0,00% | 0,00% | 0,00% | 0,00% | 0,00% | 0,00% | 0,00% | 0,00% | 0,00% | 0,00% |
| Bacteria | Acidobacteria  | Sva0725              | Sva0725            |                     |                           | 0,00% | 0,00% | 0,00% | 0,00% | 0,01% | 0,00% | 0,00% | 0,00% | 0,00% | 0,01% |
| Bacteria | Acidobacteria  | TM1                  |                    |                     |                           | 0,00% | 0,01% | 0,01% | 0,00% | 0,01% | 0,01% | 0,01% | 0,01% | 0,01% | 0,00% |
| Bacteria | Acidobacteria  | [Chloracidobacteria] | 42332              |                     |                           | 0,00% | 0,00% | 0,00% | 0,00% | 0,00% | 0,00% | 0,00% | 0,00% | 0,00% | 0,00% |
| Bacteria | Acidobacteria  | [Chloracidobacteria] | DS-100             |                     |                           | 0,00% | 0,01% | 0,01% | 0,02% | 0,01% | 0,01% | 0,01% | 0,00% | 0,01% | 0,01% |
| Bacteria | Acidobacteria  | [Chloracidobacteria] | PK29               |                     |                           | 0,00% | 0,00% | 0,00% | 0,00% | 0,00% | 0,00% | 0,00% | 0,00% | 0,00% | 0,00% |
| Bacteria | Acidobacteria  | [Chloracidobacteria] | RB41               |                     |                           | 0,00% | 0,35% | 0,15% | 0,13% | 0,27% | 0,27% | 0,28% | 0,03% | 0,24% | 0,30% |
| Bacteria | Acidobacteria  | [Chloracidobacteria] | RB41               | Ellin6075           |                           | 0,00% | 0,51% | 0,28% | 0,24% | 0,42% | 0,49% | 0,65% | 0,03% | 0,46% | 0,52% |
| Bacteria | Acidobacteria  | iii1-8               | 32-20              |                     |                           | 0,00% | 0,06% | 0,04% | 0,01% | 0,05% | 0,05% | 0,07% | 0,00% | 0,05% | 0,05% |
| Bacteria | Acidobacteria  | iii1-8               | DS-18              |                     |                           | 0,00% | 0,29% | 0,11% | 0,20% | 0,28% | 0,26% | 0,46% | 0,03% | 0,25% | 0,28% |
| Bacteria | Acidobacteria  | iii1-8               | SJA-36             |                     |                           | 0,00% | 0,00% | 0,00% | 0,00% | 0,00% | 0,00% | 0,00% | 0,00% | 0,00% | 0,00% |
| Bacteria | Actinobacteria | Acidimicrobiia       | Acidimicrobiales   | Other               |                           | 0,00% | 0,02% | 0,00% | 0,00% | 0,02% | 0,00% | 0,01% | 0,00% | 0,01% | 0,00% |
| Bacteria | Actinobacteria | Acidimicrobiia       | Acidimicrobiales   |                     |                           | 0,00% | 2,67% | 1,65% | 2,89% | 2,58% | 2,24% | 1,27% | 0,41% | 2,21% | 2,28% |
| Bacteria | Actinobacteria | Acidimicrobiia       | Acidimicrobiales   | AKIW874             |                           | 0,00% | 0,00% | 0,00% | 0,00% | 0,00% | 0,00% | 0,00% | 0,01% | 0,00% | 0,00% |
| Bacteria | Actinobacteria | Acidimicrobiia       | Acidimicrobiales   | C111                |                           | 0,00% | 0,54% | 0,46% | 0,18% | 0,55% | 0,39% | 0,23% | 0,06% | 0,38% | 0,41% |
| Bacteria | Actinobacteria | Acidimicrobiia       | Acidimicrobiales   | EB1017              |                           | 0,00% | 0,64% | 0,80% | 0,16% | 0,74% | 0,43% | 0,37% | 0,15% | 0,38% | 0,48% |
| Bacteria | Actinobacteria | Acidimicrobiia       | Acidimicrobiales   | lamiaeae            | lamia                     | 0,00% | 0,32% | 0,24% | 0,06% | 0,30% | 0,35% | 0,13% | 0,04% | 0,37% | 0,34% |
| Bacteria | Actinobacteria | Actinobacteria       | Actinomycetales    | Other               |                           | 0,00% | 0,49% | 0,37% | 0,17% | 0,49% | 0,32% | 0,24% | 0,05% | 0,31% | 0,34% |
| Bacteria | Actinobacteria | Actinobacteria       | Actinomycetales    | Actinomycetaceae    | Actinomyces               | 0,00% | 1,29% | 1,29% | 0,42% | 1,52% | 0,95% | 0,63% | 0,20% | 0,91% | 1,00% |
| Bacteria | Actinobacteria | Actinobacteria       | Actinomycetales    | Actinomycetaceae    | N09                       | 0,00% | 0,00% | 0,00% | 0,00% | 0,00% | 0,00% | 0,00% | 0,00% | 0,00% | 0,00% |
| Bacteria | Actinobacteria | Actinobacteria       | Actinomycetales    | Actinospicaceae     |                           | 0,00% | 0,05% | 0,02% | 0,00% | 0,05% | 0,02% | 0,07% | 0,01% | 0,01% | 0,02% |
| Bacteria | Actinobacteria | Actinobacteria       | Actinomycetales    | Actinosynnemataceae |                           | 0,00% | 0,04% | 0,05% | 0,00% | 0,06% | 0,02% | 0,02% | 0,03% | 0,02% | 0,02% |
| Bacteria | Actinobacteria | Actinobacteria       | Actinomycetales    | Brevibacteriaceae   | Brevibacterium            | 0,11% | 0,00% | 0,00% | 0,00% | 0,00% | 0,00% | 0,00% | 0,00% | 0,00% | 0,00% |
| Bacteria | Actinobacteria | Actinobacteria       | Actinomycetales    | Cellulomonadaceae   | Actinotalea               | 0,00% | 0,00% | 0,00% | 0,01% | 0,00% | 0,00% | 0,00% | 0,01% | 0,00% | 0,00% |
| Bacteria | Actinobacteria | Actinobacteria       | Actinomycetales    | Cellulomonadaceae   | Cellulomonas              | 0,00% | 0,00% | 0,01% | 0,00% | 0,01% | 0,00% | 0,01% | 0,03% | 0,00% | 0,00% |
| Bacteria | Actinobacteria | Actinobacteria       | Actinomycetales    | Corynebacteriaceae  | Corynebacterium           | 4,90% | 0,00% | 0,00% | 0,20% | 0,00% | 0,03% | 0,01% | 0,40% | 0,00% | 0,05% |
| Bacteria | Actinobacteria | Actinobacteria       | Actinomycetales    | Cryptosporangiaceae |                           | 0,00% | 0,00% | 0,00% | 0,00% | 0,00% | 0,00% | 0,00% | 0,00% | 0,00% | 0,00% |
| Bacteria | Actinobacteria | Actinobacteria       | Actinomycetales    | Dermabacteraceae    | Brachybacterium           | 0,00% | 0,00% | 0,00% | 0,00% | 0,00% | 0,00% | 0,00% | 0,01% | 0,00% | 0,00% |
| Bacteria | Actinobacteria | Actinobacteria       | Actinomycetales    | Dermacoccaceae      | Dermacoccus               | 0,00% | 0,01% | 0,01% | 0,01% | 0,01% | 0,01% | 0,00% | 0,00% | 0,01% | 0,01% |

| Detailed Taxonomic Classification of Actinobacteria |                |                |                 |                       |                   |                        |                        |                        |                        |                        |                        |                        |                        |                        |       |       |
|-----------------------------------------------------|----------------|----------------|-----------------|-----------------------|-------------------|------------------------|------------------------|------------------------|------------------------|------------------------|------------------------|------------------------|------------------------|------------------------|-------|-------|
| Phylum                                              | Class          | Order          | Family          | Genus                 | Abundance (%)     | Relative Abundance (%) | Relative Abundance (%) | Relative Abundance (%) | Relative Abundance (%) | Relative Abundance (%) | Relative Abundance (%) | Relative Abundance (%) | Relative Abundance (%) | Relative Abundance (%) |       |       |
| Bacteria                                            | Actinobacteria | Actinobacteria | Actinomycetales | Dietziaceae           | 0,77%             | 0,00%                  | 0,00%                  | 0,00%                  | 0,00%                  | 0,00%                  | 0,00%                  | 0,00%                  | 0,03%                  | 0,00%                  | 0,00% |       |
| Bacteria                                            | Actinobacteria | Actinobacteria | Actinomycetales | Dietziaceae           | Dietzia           | 0,00%                  | 0,00%                  | 0,00%                  | 0,00%                  | 0,00%                  | 0,00%                  | 0,00%                  | 0,00%                  | 0,00%                  | 0,00% | 0,00% |
| Bacteria                                            | Actinobacteria | Actinobacteria | Actinomycetales | Frankiaceae           | 0,00%             | 1,45%                  | 1,34%                  | 0,39%                  | 1,55%                  | 0,76%                  | 0,57%                  | 0,16%                  | 0,79%                  | 0,72%                  | 0,72% |       |
| Bacteria                                            | Actinobacteria | Actinobacteria | Actinomycetales | Frankiaceae           | Frankia           | 0,00%                  | 0,01%                  | 0,01%                  | 0,00%                  | 0,01%                  | 0,00%                  | 0,00%                  | 0,00%                  | 0,00%                  | 0,00% | 0,00% |
| Bacteria                                            | Actinobacteria | Actinobacteria | Actinomycetales | Geodermatophilaceae   | 0,00%             | 0,32%                  | 0,25%                  | 0,04%                  | 0,27%                  | 0,26%                  | 0,17%                  | 0,10%                  | 0,26%                  | 0,26%                  | 0,26% |       |
| Bacteria                                            | Actinobacteria | Actinobacteria | Actinomycetales | Geodermatophilaceae   | 0,00%             | 0,09%                  | 0,08%                  | 0,01%                  | 0,09%                  | 0,05%                  | 0,04%                  | 0,02%                  | 0,05%                  | 0,06%                  | 0,06% |       |
| Bacteria                                            | Actinobacteria | Actinobacteria | Actinomycetales | Geodermatophilaceae   | Geodermatophilus  | 0,00%                  | 0,00%                  | 0,00%                  | 0,00%                  | 0,00%                  | 0,00%                  | 0,00%                  | 0,01%                  | 0,00%                  | 0,00% | 0,00% |
| Bacteria                                            | Actinobacteria | Actinobacteria | Actinomycetales | Geodermatophilaceae   | Modestobacter     | 0,00%                  | 0,03%                  | 0,03%                  | 0,00%                  | 0,03%                  | 0,02%                  | 0,01%                  | 0,01%                  | 0,02%                  | 0,02% | 0,02% |
| Bacteria                                            | Actinobacteria | Actinobacteria | Actinomycetales | Intrasporangiaceae    | 0,00%             | 0,56%                  | 0,62%                  | 1,41%                  | 0,72%                  | 0,28%                  | 0,19%                  | 0,13%                  | 0,28%                  | 0,28%                  | 0,28% |       |
| Bacteria                                            | Actinobacteria | Actinobacteria | Actinomycetales | Intrasporangiaceae    | 0,00%             | 0,12%                  | 0,12%                  | 0,17%                  | 0,17%                  | 0,06%                  | 0,04%                  | 0,03%                  | 0,06%                  | 0,06%                  | 0,06% |       |
| Bacteria                                            | Actinobacteria | Actinobacteria | Actinomycetales | Intrasporangiaceae    | Phycococcus       | 0,00%                  | 0,01%                  | 0,01%                  | 0,01%                  | 0,01%                  | 0,00%                  | 0,00%                  | 0,00%                  | 0,00%                  | 0,01% | 0,01% |
| Bacteria                                            | Actinobacteria | Actinobacteria | Actinomycetales | Intrasporangiaceae    | Terracoccus       | 0,00%                  | 0,02%                  | 0,04%                  | 0,01%                  | 0,03%                  | 0,02%                  | 0,01%                  | 0,00%                  | 0,02%                  | 0,02% | 0,02% |
| Bacteria                                            | Actinobacteria | Actinobacteria | Actinomycetales | Kineosporiaceae       | 0,00%             | 0,06%                  | 0,07%                  | 0,03%                  | 0,07%                  | 0,03%                  | 0,02%                  | 0,01%                  | 0,02%                  | 0,02%                  | 0,03% | 0,03% |
| Bacteria                                            | Actinobacteria | Actinobacteria | Actinomycetales | Kineosporiaceae       | 0,00%             | 0,11%                  | 0,28%                  | 0,01%                  | 0,15%                  | 0,08%                  | 0,24%                  | 0,09%                  | 0,07%                  | 0,08%                  | 0,08% | 0,08% |
| Bacteria                                            | Actinobacteria | Actinobacteria | Actinomycetales | Kineosporiaceae       | Kineococcus       | 0,00%                  | 0,01%                  | 0,01%                  | 0,00%                  | 0,00%                  | 0,00%                  | 0,00%                  | 0,02%                  | 0,00%                  | 0,00% | 0,00% |
| Bacteria                                            | Actinobacteria | Actinobacteria | Actinomycetales | Microbacteriaceae     | 0,00%             | 0,07%                  | 0,09%                  | 0,06%                  | 0,08%                  | 0,05%                  | 0,04%                  | 0,05%                  | 0,05%                  | 0,05%                  | 0,05% | 0,05% |
| Bacteria                                            | Actinobacteria | Actinobacteria | Actinomycetales | Microbacteriaceae     | 0,00%             | 0,48%                  | 0,80%                  | 0,40%                  | 0,65%                  | 0,27%                  | 0,31%                  | 0,11%                  | 0,28%                  | 0,26%                  | 0,26% | 0,26% |
| Bacteria                                            | Actinobacteria | Actinobacteria | Actinomycetales | Microbacteriaceae     | Cryocola          | 0,40%                  | 0,02%                  | 0,02%                  | 0,12%                  | 0,03%                  | 0,01%                  | 0,02%                  | 0,30%                  | 0,01%                  | 0,01% | 0,01% |
| Bacteria                                            | Actinobacteria | Actinobacteria | Actinomycetales | Microbacteriaceae     | Microbacterium    | 0,00%                  | 0,00%                  | 0,01%                  | 0,01%                  | 0,00%                  | 0,00%                  | 0,00%                  | 0,03%                  | 0,00%                  | 0,01% | 0,01% |
| Bacteria                                            | Actinobacteria | Actinobacteria | Actinomycetales | Microbacteriaceae     | Rathayibacter     | 0,00%                  | 0,01%                  | 0,01%                  | 0,01%                  | 0,02%                  | 0,01%                  | 0,01%                  | 0,01%                  | 0,01%                  | 0,01% | 0,01% |
| Bacteria                                            | Actinobacteria | Actinobacteria | Actinomycetales | Microbacteriaceae     | Salinibacterium   | 0,01%                  | 0,53%                  | 0,53%                  | 0,33%                  | 0,54%                  | 0,38%                  | 0,43%                  | 0,20%                  | 0,38%                  | 0,37% | 0,37% |
| Bacteria                                            | Actinobacteria | Actinobacteria | Actinomycetales | Micrococcaceae        | 0,00%             | 0,01%                  | 0,01%                  | 0,00%                  | 0,04%                  | 0,00%                  | 0,00%                  | 0,00%                  | 0,01%                  | 0,00%                  | 0,01% | 0,00% |
| Bacteria                                            | Actinobacteria | Actinobacteria | Actinomycetales | Micrococcaceae        | 0,01%             | 0,68%                  | 0,68%                  | 0,53%                  | 0,89%                  | 0,38%                  | 0,16%                  | 0,15%                  | 0,39%                  | 0,37%                  | 0,37% | 0,37% |
| Bacteria                                            | Actinobacteria | Actinobacteria | Actinomycetales | Micrococcaceae        | Arthrobacter      | 0,13%                  | 0,71%                  | 0,60%                  | 0,44%                  | 0,78%                  | 0,37%                  | 0,18%                  | 0,17%                  | 0,39%                  | 0,35% | 0,35% |
| Bacteria                                            | Actinobacteria | Actinobacteria | Actinomycetales | Micrococcaceae        | Kocuria           | 0,01%                  | 0,00%                  | 0,00%                  | 0,00%                  | 0,00%                  | 0,00%                  | 0,00%                  | 0,00%                  | 0,00%                  | 0,00% | 0,00% |
| Bacteria                                            | Actinobacteria | Actinobacteria | Actinomycetales | Micrococcaceae        | Micrococcus       | 1,18%                  | 0,00%                  | 0,00%                  | 0,01%                  | 0,00%                  | 0,00%                  | 0,00%                  | 0,03%                  | 0,00%                  | 0,00% | 0,00% |
| Bacteria                                            | Actinobacteria | Actinobacteria | Actinomycetales | Micromonosporaceae    | 0,00%             | 0,25%                  | 0,42%                  | 0,01%                  | 0,32%                  | 0,16%                  | 0,22%                  | 0,12%                  | 0,15%                  | 0,17%                  | 0,17% | 0,17% |
| Bacteria                                            | Actinobacteria | Actinobacteria | Actinomycetales | Micromonosporaceae    | 0,00%             | 1,09%                  | 2,27%                  | 0,04%                  | 1,69%                  | 0,76%                  | 1,22%                  | 0,41%                  | 0,78%                  | 0,72%                  | 0,72% | 0,72% |
| Bacteria                                            | Actinobacteria | Actinobacteria | Actinomycetales | Micromonosporaceae    | Actinoplanes      | 0,00%                  | 0,05%                  | 0,11%                  | 0,00%                  | 0,09%                  | 0,04%                  | 0,11%                  | 0,04%                  | 0,03%                  | 0,03% | 0,05% |
| Bacteria                                            | Actinobacteria | Actinobacteria | Actinomycetales | Micromonosporaceae    | Catellatospora    | 0,00%                  | 0,00%                  | 0,00%                  | 0,00%                  | 0,00%                  | 0,00%                  | 0,00%                  | 0,00%                  | 0,00%                  | 0,00% | 0,00% |
| Bacteria                                            | Actinobacteria | Actinobacteria | Actinomycetales | Micromonosporaceae    | Dactylosporangium | 0,00%                  | 0,12%                  | 0,33%                  | 0,01%                  | 0,32%                  | 0,13%                  | 0,18%                  | 0,08%                  | 0,12%                  | 0,13% | 0,13% |
| Bacteria                                            | Actinobacteria | Actinobacteria | Actinomycetales | Micromonosporaceae    | Micromonospora    | 0,00%                  | 0,00%                  | 0,00%                  | 0,00%                  | 0,00%                  | 0,00%                  | 0,00%                  | 0,00%                  | 0,00%                  | 0,00% | 0,00% |
| Bacteria                                            | Actinobacteria | Actinobacteria | Actinomycetales | Micromonosporaceae    | Pilimelia         | 0,00%                  | 0,01%                  | 0,01%                  | 0,00%                  | 0,01%                  | 0,01%                  | 0,01%                  | 0,00%                  | 0,00%                  | 0,00% | 0,01% |
| Bacteria                                            | Actinobacteria | Actinobacteria | Actinomycetales | Micromonosporaceae    | Virgisporangium   | 0,00%                  | 0,04%                  | 0,05%                  | 0,00%                  | 0,04%                  | 0,02%                  | 0,04%                  | 0,02%                  | 0,03%                  | 0,02% | 0,02% |
| Bacteria                                            | Actinobacteria | Actinobacteria | Actinomycetales | Mycobacteriaceae      | Mycobacterium     | 0,00%                  | 1,79%                  | 2,41%                  | 0,07%                  | 2,43%                  | 0,84%                  | 1,52%                  | 0,50%                  | 0,89%                  | 0,77% | 0,77% |
| Bacteria                                            | Actinobacteria | Actinobacteria | Actinomycetales | Nakamurellaceae       | 0,00%             | 0,32%                  | 0,25%                  | 0,00%                  | 0,32%                  | 0,18%                  | 0,09%                  | 0,04%                  | 0,17%                  | 0,19%                  | 0,19% | 0,19% |
| Bacteria                                            | Actinobacteria | Actinobacteria | Actinomycetales | Nocardiaceae          | 0,00%             | 0,00%                  | 0,00%                  | 0,00%                  | 0,00%                  | 0,00%                  | 0,00%                  | 0,00%                  | 0,00%                  | 0,00%                  | 0,00% | 0,00% |
| Bacteria                                            | Actinobacteria | Actinobacteria | Actinomycetales | Nocardiaceae          | 0,00%             | 0,02%                  | 0,03%                  | 0,00%                  | 0,02%                  | 0,01%                  | 0,02%                  | 0,01%                  | 0,01%                  | 0,01%                  | 0,01% | 0,01% |
| Bacteria                                            | Actinobacteria | Actinobacteria | Actinomycetales | Nocardiaceae          | Nocardia          | 0,00%                  | 0,04%                  | 0,03%                  | 0,01%                  | 0,02%                  | 0,02%                  | 0,01%                  | 0,00%                  | 0,02%                  | 0,02% | 0,02% |
| Bacteria                                            | Actinobacteria | Actinobacteria | Actinomycetales | Nocardiaceae          | Rhodococcus       | 0,00%                  | 0,07%                  | 0,09%                  | 0,02%                  | 0,07%                  | 0,03%                  | 0,02%                  | 0,00%                  | 0,03%                  | 0,03% | 0,03% |
| Bacteria                                            | Actinobacteria | Actinobacteria | Actinomycetales | Nocardiodiaceae       | 0,00%             | 1,74%                  | 2,64%                  | 3,21%                  | 2,25%                  | 1,00%                  | 0,80%                  | 0,86%                  | 1,02%                  | 0,98%                  | 0,98% | 0,98% |
| Bacteria                                            | Actinobacteria | Actinobacteria | Actinomycetales | Nocardiodiaceae       | Actinopolymorpha  | 0,00%                  | 0,00%                  | 0,01%                  | 0,00%                  | 0,00%                  | 0,00%                  | 0,00%                  | 0,00%                  | 0,00%                  | 0,00% | 0,00% |
| Bacteria                                            | Actinobacteria | Actinobacteria | Actinomycetales | Nocardiodiaceae       | Aeromicrobium     | 0,00%                  | 0,17%                  | 0,54%                  | 0,07%                  | 0,20%                  | 0,11%                  | 0,16%                  | 0,01%                  | 0,11%                  | 0,12% | 0,12% |
| Bacteria                                            | Actinobacteria | Actinobacteria | Actinomycetales | Nocardiodiaceae       | Friedmanniella    | 0,00%                  | 0,06%                  | 0,08%                  | 0,00%                  | 0,04%                  | 0,05%                  | 0,04%                  | 0,03%                  | 0,06%                  | 0,04% | 0,04% |
| Bacteria                                            | Actinobacteria | Actinobacteria | Actinomycetales | Nocardiodiaceae       | Kribbella         | 0,00%                  | 0,33%                  | 0,40%                  | 0,04%                  | 0,37%                  | 0,20%                  | 0,19%                  | 0,04%                  | 0,19%                  | 0,22% | 0,22% |
| Bacteria                                            | Actinobacteria | Actinobacteria | Actinomycetales | Nocardiodiaceae       | Nocardioides      | 0,00%                  | 1,09%                  | 1,38%                  | 0,51%                  | 1,39%                  | 0,51%                  | 0,45%                  | 0,35%                  | 0,53%                  | 0,49% | 0,49% |
| Bacteria                                            | Actinobacteria | Actinobacteria | Actinomycetales | Nocardiodiaceae       | Pimelobacter      | 0,00%                  | 0,00%                  | 0,01%                  | 0,00%                  | 0,00%                  | 0,00%                  | 0,00%                  | 0,00%                  | 0,00%                  | 0,00% | 0,00% |
| Bacteria                                            | Actinobacteria | Actinobacteria | Actinomycetales | Nocardiodiaceae       | Propionicimonas   | 0,00%                  | 0,00%                  | 0,01%                  | 0,00%                  | 0,00%                  | 0,00%                  | 0,00%                  | 0,00%                  | 0,00%                  | 0,00% | 0,00% |
| Bacteria                                            | Actinobacteria | Actinobacteria | Actinomycetales | Promicromonosporaceae | Promicromonospora | 0,00%                  | 0,00%                  | 0,00%                  | 0,00%                  | 0,00%                  | 0,00%                  | 0,00%                  | 0,02%                  | 0,00%                  | 0,00% | 0,00% |
| Bacteria                                            | Actinobacteria | Actinobacteria | Actinomycetales | Promicromonosporaceae | Xylanimicrobium   | 0,00%                  | 0,00%                  | 0,00%                  | 0,01%                  | 0,00%                  | 0,00%                  | 0,00%                  | 0,03%                  | 0,00%                  | 0,00% | 0,00% |
| Bacteria                                            | Actinobacteria | Actinobacteria | Actinomycetales | Propionibacteriaceae  | 0,00%             | 0,06%                  | 0,08%                  | 0,00%                  | 0,04%                  | 0,05%                  | 0,03%                  | 0,06%                  | 0,05%                  | 0,06%                  | 0,06% | 0,06% |
| Bacteria                                            | Actinobacteria | Actinobacteria | Actinomycetales | Propionibacteriaceae  | Microlunatus      | 0,00%                  | 0,04%                  | 0,03%                  | 0,00%                  | 0,02%                  | 0,02%                  | 0,01%                  | 0,00%                  | 0,02%                  | 0,02% | 0,02% |
| Bacteria                                            | Actinobacteria | Actinobacteria | Actinomycetales | Propionibacteriaceae  | Propionibacterium | 32,59%                 | 0,00%                  | 0,00%                  | 0,04%                  | 0,00%                  | 0,00%                  | 0,01%                  | 0,31%                  | 0,00%                  | 0,00% | 0,00% |



|          |               |                  |                    |                     |                         |       |       |       |       |       |       |       |       |       |       |
|----------|---------------|------------------|--------------------|---------------------|-------------------------|-------|-------|-------|-------|-------|-------|-------|-------|-------|-------|
| Bacteria | Bacteroidetes | Cytophagia       | Cytophagales       | Cytophagaceae       |                         | 0,00% | 0,06% | 0,11% | 0,01% | 0,05% | 0,05% | 0,14% | 0,02% | 0,06% | 0,04% |
| Bacteria | Bacteroidetes | Cytophagia       | Cytophagales       | Cytophagaceae       | Cytophaga               | 0,00% | 0,02% | 0,05% | 0,00% | 0,01% | 0,03% | 0,21% | 0,02% | 0,04% | 0,02% |
| Bacteria | Bacteroidetes | Cytophagia       | Cytophagales       | Cytophagaceae       | Dyadobacter             | 0,00% | 0,01% | 0,04% | 0,00% | 0,00% | 0,00% | 0,00% | 0,00% | 0,01% | 0,00% |
| Bacteria | Bacteroidetes | Cytophagia       | Cytophagales       | Cytophagaceae       | Hymenobacter            | 0,00% | 0,02% | 0,04% | 0,00% | 0,02% | 0,03% | 0,04% | 0,00% | 0,03% | 0,03% |
| Bacteria | Bacteroidetes | Cytophagia       | Cytophagales       | Cytophagaceae       | Spirosoma               | 0,00% | 0,00% | 0,01% | 0,00% | 0,00% | 0,00% | 0,00% | 0,00% | 0,00% | 0,00% |
| Bacteria | Bacteroidetes | Cytophagia       | Cytophagales       | Cytophagaceae       | Sporocytophaga          | 0,00% | 0,01% | 0,01% | 0,00% | 0,00% | 0,01% | 0,01% | 0,01% | 0,01% | 0,01% |
| Bacteria | Bacteroidetes | Cytophagia       | Cytophagales       | [Amoebophilaceae]   | Candidatus Amoebophilus | 0,00% | 0,00% | 0,00% | 0,00% | 0,00% | 0,00% | 0,00% | 0,00% | 0,00% | 0,00% |
| Bacteria | Bacteroidetes | Flavobacteriia   | Flavobacteriales   | Cryomorphaceae      |                         | 0,00% | 0,01% | 0,02% | 0,01% | 0,01% | 0,01% | 0,02% | 0,00% | 0,02% | 0,01% |
| Bacteria | Bacteroidetes | Flavobacteriia   | Flavobacteriales   | Cryomorphaceae      | Fluviicola              | 0,00% | 0,01% | 0,05% | 0,00% | 0,01% | 0,04% | 0,12% | 0,00% | 0,05% | 0,02% |
| Bacteria | Bacteroidetes | Flavobacteriia   | Flavobacteriales   | Flavobacteriaceae   |                         | 0,00% | 0,00% | 0,00% | 0,00% | 0,00% | 0,00% | 0,00% | 0,00% | 0,00% | 0,00% |
| Bacteria | Bacteroidetes | Flavobacteriia   | Flavobacteriales   | Flavobacteriaceae   | Flavobacterium          | 0,00% | 0,03% | 0,05% | 0,05% | 0,02% | 0,04% | 0,74% | 0,00% | 0,05% | 0,02% |
| Bacteria | Bacteroidetes | Flavobacteriia   | Flavobacteriales   | [Weeksellaceae]     | Chryseobacterium        | 0,00% | 0,00% | 0,00% | 0,03% | 0,00% | 0,01% | 0,02% | 0,00% | 0,01% | 0,00% |
| Bacteria | Bacteroidetes | Flavobacteriia   | Flavobacteriales   | [Weeksellaceae]     | Cloacibacterium         | 0,00% | 0,00% | 0,00% | 0,00% | 0,00% | 0,00% | 0,00% | 0,04% | 0,00% | 0,00% |
| Bacteria | Bacteroidetes | Flavobacteriia   | Flavobacteriales   | [Weeksellaceae]     | Wautersiella            | 0,00% | 0,00% | 0,00% | 0,00% | 0,00% | 0,00% | 0,00% | 0,00% | 0,00% | 0,00% |
| Bacteria | Bacteroidetes | Sphingobacteriia | Sphingobacteriales |                     |                         | 0,00% | 0,14% | 0,13% | 0,03% | 0,08% | 0,12% | 0,31% | 0,04% | 0,13% | 0,10% |
| Bacteria | Bacteroidetes | Sphingobacteriia | Sphingobacteriales | Sphingobacteriaceae |                         | 0,00% | 0,58% | 0,65% | 0,95% | 0,36% | 0,78% | 2,02% | 0,78% | 0,80% | 0,74% |
| Bacteria | Bacteroidetes | Sphingobacteriia | Sphingobacteriales | Sphingobacteriaceae | Olivibacter             | 0,00% | 0,00% | 0,00% | 0,00% | 0,00% | 0,00% | 0,00% | 0,00% | 0,00% | 0,00% |
| Bacteria | Bacteroidetes | Sphingobacteriia | Sphingobacteriales | Sphingobacteriaceae | Pedobacter              | 0,00% | 0,02% | 0,04% | 0,17% | 0,01% | 0,03% | 0,07% | 0,01% | 0,03% | 0,03% |
| Bacteria | Bacteroidetes | Sphingobacteriia | Sphingobacteriales | Sphingobacteriaceae | Sphingobacterium        | 0,00% | 0,00% | 0,00% | 0,00% | 0,00% | 0,00% | 0,00% | 0,01% | 0,00% | 0,00% |
| Bacteria | Bacteroidetes | [Rhodothermi]    | [Rhodothermales]   | Rhodothermaceae     | Rubricoccus             | 0,00% | 0,00% | 0,00% | 0,00% | 0,00% | 0,00% | 0,00% | 0,00% | 0,00% | 0,00% |
| Bacteria | Bacteroidetes | [Saprospirae]    | [Saprospirales]    |                     |                         | 0,00% | 0,01% | 0,01% | 0,00% | 0,01% | 0,01% | 0,01% | 0,00% | 0,01% | 0,00% |
| Bacteria | Bacteroidetes | [Saprospirae]    | [Saprospirales]    | Chitinophagaceae    |                         | 0,00% | 1,11% | 1,63% | 0,58% | 0,92% | 1,50% | 2,68% | 0,59% | 1,53% | 1,46% |
| Bacteria | Bacteroidetes | [Saprospirae]    | [Saprospirales]    | Chitinophagaceae    | Chitinophaga            | 0,00% | 0,02% | 0,01% | 0,02% | 0,01% | 0,01% | 0,03% | 0,01% | 0,01% | 0,01% |
| Bacteria | Bacteroidetes | [Saprospirae]    | [Saprospirales]    | Chitinophagaceae    | Flavisolibacter         | 0,00% | 0,15% | 0,16% | 0,04% | 0,12% | 0,20% | 0,37% | 0,02% | 0,20% | 0,20% |
| Bacteria | Bacteroidetes | [Saprospirae]    | [Saprospirales]    | Chitinophagaceae    | Niabella                | 0,00% | 0,00% | 0,00% | 0,00% | 0,00% | 0,00% | 0,00% | 0,00% | 0,00% | 0,00% |
| Bacteria | Bacteroidetes | [Saprospirae]    | [Saprospirales]    | Chitinophagaceae    | Sediminibacterium       | 0,00% | 0,00% | 0,00% | 0,02% | 0,00% | 0,01% | 0,02% | 0,01% | 0,01% | 0,00% |
| Bacteria | Bacteroidetes | [Saprospirae]    | [Saprospirales]    | Chitinophagaceae    | Segetibacter            | 0,00% | 0,04% | 0,04% | 0,01% | 0,02% | 0,06% | 0,05% | 0,01% | 0,05% | 0,06% |
| Bacteria | Bacteroidetes | [Saprospirae]    | [Saprospirales]    | Saprospiraceae      |                         | 0,00% | 0,02% | 0,02% | 0,01% | 0,02% | 0,02% | 0,04% | 0,01% | 0,02% | 0,02% |
| Bacteria | Chlamydiae    | Chlamydiia       | Chlamydiales       | Criblamydiaceae     |                         | 0,00% | 0,01% | 0,00% | 0,00% | 0,00% | 0,00% | 0,00% | 0,00% | 0,00% | 0,00% |
| Bacteria | Chlorobi      |                  |                    |                     |                         | 0,00% | 0,04% | 0,01% | 0,01% | 0,01% | 0,02% | 0,03% | 0,00% | 0,02% | 0,02% |
| Bacteria | Chlorobi      | BSV26            | PK329              |                     |                         | 0,00% | 0,00% | 0,00% | 0,00% | 0,00% | 0,00% | 0,00% | 0,00% | 0,00% | 0,00% |
| Bacteria | Chlorobi      | OPB56            |                    |                     |                         | 0,00% | 0,00% | 0,00% | 0,00% | 0,00% | 0,00% | 0,00% | 0,01% | 0,00% | 0,00% |
| Bacteria | Chlorobi      | SJA-28           |                    |                     |                         | 0,00% | 0,00% | 0,00% | 0,00% | 0,00% | 0,00% | 0,00% | 0,00% | 0,00% | 0,00% |
| Bacteria | Chloroflexi   |                  |                    |                     |                         | 0,00% | 0,00% | 0,00% | 0,00% | 0,00% | 0,00% | 0,00% | 0,00% | 0,00% | 0,00% |
| Bacteria | Chloroflexi   | Anaerolineae     | A31                | S47                 |                         | 0,00% | 0,10% | 0,03% | 0,01% | 0,05% | 0,02% | 0,01% | 0,00% | 0,02% | 0,02% |
| Bacteria | Chloroflexi   | Anaerolineae     | CFB-26             |                     |                         | 0,00% | 0,00% | 0,00% | 0,00% | 0,00% | 0,00% | 0,00% | 0,00% | 0,00% | 0,00% |
| Bacteria | Chloroflexi   | Anaerolineae     | Caldilineales      | Caldilineaceae      |                         | 0,00% | 0,07% | 0,06% | 0,01% | 0,05% | 0,03% | 0,02% | 0,01% | 0,03% | 0,03% |
| Bacteria | Chloroflexi   | Anaerolineae     | H39                |                     |                         | 0,00% | 0,10% | 0,04% | 0,02% | 0,06% | 0,05% | 0,04% | 0,01% | 0,04% | 0,05% |
| Bacteria | Chloroflexi   | Anaerolineae     | SBR1031            | A4b                 |                         | 0,00% | 0,20% | 0,18% | 0,04% | 0,10% | 0,12% | 0,19% | 0,04% | 0,12% | 0,12% |
| Bacteria | Chloroflexi   | Anaerolineae     | SBR1031            | oc28                |                         | 0,00% | 0,01% | 0,00% | 0,00% | 0,01% | 0,00% | 0,00% | 0,00% | 0,00% | 0,00% |
| Bacteria | Chloroflexi   | Anaerolineae     | envOPS12           |                     |                         | 0,00% | 0,00% | 0,00% | 0,00% | 0,00% | 0,00% | 0,00% | 0,00% | 0,00% | 0,00% |
| Bacteria | Chloroflexi   | C0119            |                    |                     |                         | 0,00% | 0,16% | 0,16% | 0,06% | 0,15% | 0,11% | 0,08% | 0,02% | 0,11% | 0,10% |
| Bacteria | Chloroflexi   | Chloroflexi      | Herpetosiphonales  |                     |                         | 0,00% | 0,00% | 0,00% | 0,00% | 0,00% | 0,00% | 0,00% | 0,00% | 0,00% | 0,00% |
| Bacteria | Chloroflexi   | Chloroflexi      | [Roseiflexales]    | [Kouleothrixaceae]  |                         | 0,00% | 0,27% | 0,27% | 0,01% | 0,27% | 0,14% | 0,19% | 0,02% | 0,14% | 0,13% |
| Bacteria | Chloroflexi   | Ellin6529        |                    |                     |                         | 1,51% | 4,78% | 2,81% | 1,17% | 4,26% | 2,76% | 1,53% | 0,77% | 2,77% | 2,74% |
| Bacteria | Chloroflexi   | Gitt-GS-136      |                    |                     |                         | 0,00% | 1,23% | 1,01% | 0,65% | 1,22% | 0,68% | 0,29% | 0,18% | 0,59% | 0,80% |
| Bacteria | Chloroflexi   | Ktedonobacteria  | JG30-KF-AS9        |                     |                         | 0,00% | 0,01% | 0,03% | 0,00% | 0,00% | 0,01% | 0,01% | 0,00% | 0,01% | 0,00% |
| Bacteria | Chloroflexi   | P2-11E           |                    |                     |                         | 0,00% | 0,04% | 0,02% | 0,06% | 0,04% | 0,05% | 0,03% | 0,06% | 0,06% | 0,05% |
| Bacteria | Chloroflexi   | S085             |                    |                     |                         | 0,00% | 0,31% | 0,17% | 0,06% | 0,26% | 0,14% | 0,11% | 0,04% | 0,13% | 0,15% |
| Bacteria | Chloroflexi   | TK10             |                    |                     |                         | 0,00% | 0,03% | 0,02% | 0,00% | 0,03% | 0,02% | 0,01% | 0,00% | 0,02% | 0,02% |
| Bacteria | Chloroflexi   | TK10             | AKYG885            | 5B-12               |                         | 0,00% | 0,03% | 0,01% | 0,00% | 0,03% | 0,02% | 0,01% | 0,00% | 0,02% | 0,03% |
| Bacteria | Chloroflexi   | TK10             | AKYG885            | Dolo                |                         | 0,00% | 0,18% | 0,08% | 0,00% | 0,14% | 0,05% | 0,04% | 0,05% | 0,05% | 0,06% |
| Bacteria | Chloroflexi   | TK10             | B07                | WMSP1               |                         | 0,00% | 0,04% | 0,02% | 0,01% | 0,04% | 0,01% | 0,01% | 0,02% | 0,01% | 0,01% |





|          |                  |                     |                  |                   |                  |       |       |       |       |       |       |       |       |       |       |
|----------|------------------|---------------------|------------------|-------------------|------------------|-------|-------|-------|-------|-------|-------|-------|-------|-------|-------|
| Bacteria | Fusobacteria     | Fusobacteriia       | Fusobacteriales  | Fusobacteriaceae  | Fusobacterium    | 0,00% | 0,00% | 0,00% | 0,00% | 0,00% | 0,00% | 0,00% | 0,00% | 0,00% | 0,00% |
| Bacteria | Gemmatimonadetes | Gemm-1              |                  |                   |                  | 0,00% | 2,34% | 1,32% | 0,26% | 2,27% | 2,13% | 1,48% | 0,24% | 1,93% | 2,36% |
| Bacteria | Gemmatimonadetes | Gemm-2              |                  |                   |                  | 0,00% | 0,02% | 0,01% | 0,01% | 0,02% | 0,02% | 0,01% | 0,04% | 0,02% | 0,02% |
| Bacteria | Gemmatimonadetes | Gemm-3              |                  |                   |                  | 0,00% | 0,00% | 0,00% | 0,00% | 0,00% | 0,00% | 0,00% | 0,00% | 0,00% | 0,00% |
| Bacteria | Gemmatimonadetes | Gemm-5              |                  |                   |                  | 0,00% | 0,15% | 0,03% | 0,10% | 0,10% | 0,09% | 0,12% | 0,32% | 0,08% | 0,11% |
| Bacteria | Gemmatimonadetes | Gemmatimonadetes    |                  |                   |                  | 0,00% | 0,21% | 0,24% | 0,09% | 0,30% | 0,35% | 0,22% | 0,04% | 0,34% | 0,35% |
| Bacteria | Gemmatimonadetes | Gemmatimonadetes    | Ellin5290        |                   |                  | 0,00% | 0,35% | 0,18% | 0,10% | 0,22% | 0,25% | 0,26% | 0,16% | 0,23% | 0,28% |
| Bacteria | Gemmatimonadetes | Gemmatimonadetes    | Gemmatimonadales |                   |                  | 0,00% | 0,02% | 0,06% | 0,01% | 0,03% | 0,04% | 0,03% | 0,01% | 0,04% | 0,04% |
| Bacteria | Gemmatimonadetes | Gemmatimonadetes    | Gemmatimonadales | Ellin5301         |                  | 0,00% | 0,88% | 0,62% | 0,16% | 0,83% | 0,75% | 0,78% | 0,09% | 0,67% | 0,84% |
| Bacteria | Gemmatimonadetes | Gemmatimonadetes    | Gemmatimonadales | Gemmatimonadaceae | Gemmatimonas     | 0,00% | 0,00% | 0,00% | 0,00% | 0,01% | 0,01% | 0,00% | 0,00% | 0,01% | 0,00% |
| Bacteria | Gemmatimonadetes | Gemmatimonadetes    | KD8-87           |                   |                  | 0,00% | 0,00% | 0,01% | 0,00% | 0,00% | 0,00% | 0,00% | 0,00% | 0,00% | 0,00% |
| Bacteria | Gemmatimonadetes | Gemmatimonadetes    | N1423WL          |                   |                  | 0,00% | 1,85% | 0,59% | 2,07% | 1,43% | 1,35% | 1,43% | 2,42% | 1,25% | 1,47% |
| Bacteria | MVP-21           |                     |                  |                   |                  | 0,00% | 0,01% | 0,01% | 0,06% | 0,02% | 0,01% | 0,01% | 0,01% | 0,01% | 0,01% |
| Bacteria | Nitrospirae      | Nitrospira          | Nitrospirales    | 0319-6A21         |                  | 0,00% | 0,01% | 0,01% | 0,00% | 0,01% | 0,01% | 0,01% | 0,00% | 0,01% | 0,01% |
| Bacteria | Nitrospirae      | Nitrospira          | Nitrospirales    | Nitrospiraceae    |                  | 0,00% | 0,01% | 0,00% | 0,00% | 0,01% | 0,00% | 0,00% | 0,00% | 0,00% | 0,01% |
| Bacteria | Nitrospirae      | Nitrospira          | Nitrospirales    | Nitrospiraceae    | JG37-AG-70       | 0,00% | 0,00% | 0,00% | 0,00% | 0,01% | 0,00% | 0,00% | 0,00% | 0,00% | 0,00% |
| Bacteria | Nitrospirae      | Nitrospira          | Nitrospirales    | Nitrospiraceae    | Nitrospira       | 0,00% | 0,06% | 0,05% | 0,00% | 0,06% | 0,06% | 0,04% | 0,02% | 0,06% | 0,07% |
| Bacteria | OD1              |                     |                  |                   |                  | 0,00% | 0,00% | 0,00% | 0,00% | 0,00% | 0,00% | 0,00% | 0,01% | 0,00% | 0,00% |
| Bacteria | OD1              | SM2F11              |                  |                   |                  | 0,00% | 0,04% | 0,02% | 0,02% | 0,01% | 0,02% | 0,05% | 0,01% | 0,02% | 0,02% |
| Bacteria | OD1              | ZB2                 |                  |                   |                  | 0,00% | 0,04% | 0,03% | 0,02% | 0,02% | 0,03% | 0,05% | 0,02% | 0,03% | 0,04% |
| Bacteria | OP11             | OP11-1              |                  |                   |                  | 0,00% | 0,00% | 0,00% | 0,00% | 0,00% | 0,00% | 0,00% | 0,00% | 0,00% | 0,00% |
| Bacteria | OP11             | OP11-3              |                  |                   |                  | 0,00% | 0,00% | 0,00% | 0,00% | 0,00% | 0,00% | 0,00% | 0,00% | 0,00% | 0,00% |
| Bacteria | OP11             | OP11-4              |                  |                   |                  | 0,00% | 0,00% | 0,00% | 0,01% | 0,00% | 0,00% | 0,00% | 0,01% | 0,00% | 0,00% |
| Bacteria | OP11             | WCHB1-64            |                  |                   |                  | 0,00% | 0,00% | 0,00% | 0,00% | 0,00% | 0,00% | 0,00% | 0,01% | 0,00% | 0,00% |
| Bacteria | OP11             | WCHB1-64            | d153             |                   |                  | 0,00% | 0,00% | 0,00% | 0,00% | 0,00% | 0,00% | 0,00% | 0,00% | 0,00% | 0,00% |
| Bacteria | Planctomycetes   | BD7-11              |                  |                   |                  | 0,00% | 0,01% | 0,00% | 0,00% | 0,01% | 0,01% | 0,00% | 0,00% | 0,01% | 0,01% |
| Bacteria | Planctomycetes   | OM190               | agg27            |                   |                  | 0,00% | 0,00% | 0,00% | 0,00% | 0,00% | 0,00% | 0,00% | 0,00% | 0,00% | 0,00% |
| Bacteria | Planctomycetes   | Phycisphaerae       | Phycisphaerales  |                   |                  | 0,00% | 0,00% | 0,01% | 0,00% | 0,01% | 0,01% | 0,01% | 0,00% | 0,01% | 0,01% |
| Bacteria | Planctomycetes   | Phycisphaerae       | WD2101           |                   |                  | 0,00% | 0,87% | 0,63% | 0,08% | 0,68% | 0,59% | 0,56% | 0,10% | 0,48% | 0,72% |
| Bacteria | Planctomycetes   | Pla4                |                  |                   |                  | 0,00% | 0,00% | 0,00% | 0,00% | 0,00% | 0,00% | 0,00% | 0,00% | 0,00% | 0,00% |
| Bacteria | Planctomycetes   | Planctomycetia      | B97              |                   |                  | 0,00% | 0,00% | 0,00% | 0,01% | 0,00% | 0,00% | 0,00% | 0,00% | 0,00% | 0,00% |
| Bacteria | Planctomycetes   | Planctomycetia      | Gemmatales       | Gemmataceae       |                  | 0,00% | 0,46% | 0,37% | 0,15% | 0,34% | 0,16% | 0,09% | 0,05% | 0,15% | 0,19% |
| Bacteria | Planctomycetes   | Planctomycetia      | Gemmatales       | Gemmataceae       | Gemmata          | 0,00% | 0,24% | 0,26% | 0,06% | 0,21% | 0,11% | 0,07% | 0,05% | 0,10% | 0,12% |
| Bacteria | Planctomycetes   | Planctomycetia      | Gemmatales       | Isosphaeraeae     |                  | 0,00% | 0,34% | 0,94% | 0,06% | 0,26% | 0,23% | 0,14% | 0,12% | 0,20% | 0,27% |
| Bacteria | Planctomycetes   | Planctomycetia      | Pirellulales     | Pirellulaceae     |                  | 0,00% | 0,21% | 0,25% | 0,06% | 0,15% | 0,09% | 0,12% | 0,07% | 0,08% | 0,10% |
| Bacteria | Planctomycetes   | Planctomycetia      | Pirellulales     | Pirellulaceae     | A17              | 0,00% | 0,03% | 0,03% | 0,02% | 0,03% | 0,02% | 0,02% | 0,03% | 0,01% | 0,02% |
| Bacteria | Planctomycetes   | Planctomycetia      | Pirellulales     | Pirellulaceae     | Pirellula        | 0,00% | 0,03% | 0,03% | 0,01% | 0,02% | 0,01% | 0,01% | 0,00% | 0,01% | 0,01% |
| Bacteria | Planctomycetes   | Planctomycetia      | Planctomycetales | Planctomycetaceae | Planctomyces     | 0,00% | 0,10% | 0,08% | 0,06% | 0,06% | 0,06% | 0,03% | 0,05% | 0,05% | 0,07% |
| Bacteria | Planctomycetes   | vadinHA49           | DH61             |                   |                  | 0,00% | 0,02% | 0,01% | 0,00% | 0,01% | 0,01% | 0,01% | 0,01% | 0,02% | 0,01% |
| Bacteria | Proteobacteria   | Alphaproteobacteria | Other            |                   |                  | 0,00% | 0,00% | 0,00% | 0,00% | 0,00% | 0,00% | 0,00% | 0,00% | 0,00% | 0,00% |
| Bacteria | Proteobacteria   | Alphaproteobacteria |                  |                   |                  | 0,00% | 0,06% | 0,04% | 0,02% | 0,05% | 0,05% | 0,05% | 0,04% | 0,05% | 0,05% |
| Bacteria | Proteobacteria   | Alphaproteobacteria | BD7-3            |                   |                  | 0,00% | 0,01% | 0,01% | 0,00% | 0,01% | 0,01% | 0,02% | 0,00% | 0,01% | 0,01% |
| Bacteria | Proteobacteria   | Alphaproteobacteria | Caulobacterales  | Caulobacteraceae  |                  | 0,00% | 0,00% | 0,00% | 0,01% | 0,00% | 0,00% | 0,01% | 0,00% | 0,00% | 0,00% |
| Bacteria | Proteobacteria   | Alphaproteobacteria | Caulobacterales  | Caulobacteraceae  |                  | 0,00% | 0,28% | 0,20% | 0,23% | 0,28% | 0,34% | 0,31% | 0,15% | 0,30% | 0,39% |
| Bacteria | Proteobacteria   | Alphaproteobacteria | Caulobacterales  | Caulobacteraceae  | Asticcacaulis    | 0,00% | 0,02% | 0,03% | 0,06% | 0,03% | 0,04% | 0,12% | 0,04% | 0,03% | 0,06% |
| Bacteria | Proteobacteria   | Alphaproteobacteria | Caulobacterales  | Caulobacteraceae  | Brevundimonas    | 0,00% | 0,00% | 0,00% | 0,00% | 0,00% | 0,00% | 0,00% | 0,00% | 0,00% | 0,00% |
| Bacteria | Proteobacteria   | Alphaproteobacteria | Caulobacterales  | Caulobacteraceae  | Caulobacter      | 0,00% | 0,01% | 0,02% | 0,03% | 0,03% | 0,04% | 0,12% | 0,02% | 0,05% | 0,02% |
| Bacteria | Proteobacteria   | Alphaproteobacteria | Caulobacterales  | Caulobacteraceae  | Mycoplana        | 0,00% | 0,01% | 0,00% | 0,01% | 0,01% | 0,01% | 0,01% | 0,00% | 0,01% | 0,01% |
| Bacteria | Proteobacteria   | Alphaproteobacteria | Caulobacterales  | Caulobacteraceae  | Phenylobacterium | 0,00% | 0,40% | 0,37% | 0,28% | 0,43% | 0,56% | 0,60% | 0,10% | 0,52% | 0,62% |
| Bacteria | Proteobacteria   | Alphaproteobacteria | Ellin329         |                   |                  | 0,00% | 2,33% | 1,70% | 1,50% | 1,71% | 2,56% | 2,56% | 1,33% | 2,63% | 2,48% |
| Bacteria | Proteobacteria   | Alphaproteobacteria | Rhizobiales      | Other             |                  | 0,00% | 0,04% | 0,05% | 0,11% | 0,04% | 0,03% | 0,03% | 0,01% | 0,03% | 0,03% |
| Bacteria | Proteobacteria   | Alphaproteobacteria | Rhizobiales      |                   |                  | 0,00% | 0,73% | 0,52% | 0,53% | 0,73% | 0,46% | 0,41% | 0,37% | 0,46% | 0,45% |
| Bacteria | Proteobacteria   | Alphaproteobacteria | Rhizobiales      | Aurantimonadaceae |                  | 0,00% | 0,00% | 0,02% | 0,01% | 0,00% | 0,00% | 0,00% | 0,01% | 0,00% | 0,00% |

| Taxonomic Classification |                |                     |                  | Relative Abundance (%) |                  |       |       |       |       |       |       |       |       |       |       |       |
|--------------------------|----------------|---------------------|------------------|------------------------|------------------|-------|-------|-------|-------|-------|-------|-------|-------|-------|-------|-------|
| Kingdom                  | Phylum         | Class               | Order            | Family                 | Genus            | 0     | 1     | 2     | 3     | 4     | 5     | 6     | 7     | 8     | 9     | 10    |
| Bacteria                 | Proteobacteria | Alphaproteobacteria | Rhizobiales      | Beijerinckiaceae       |                  | 0,00% | 0,00% | 0,00% | 0,01% | 0,00% | 0,00% | 0,00% | 0,00% | 0,00% | 0,00% | 0,00% |
| Bacteria                 | Proteobacteria | Alphaproteobacteria | Rhizobiales      | Beijerinckiaceae       |                  | 0,00% | 0,10% | 0,10% | 0,07% | 0,11% | 0,08% | 0,05% | 0,08% | 0,07% | 0,08% | 0,08% |
| Bacteria                 | Proteobacteria | Alphaproteobacteria | Rhizobiales      | Beijerinckiaceae       | Beijerinckia     | 0,00% | 0,00% | 0,00% | 0,01% | 0,00% | 0,00% | 0,00% | 0,00% | 0,00% | 0,00% | 0,00% |
| Bacteria                 | Proteobacteria | Alphaproteobacteria | Rhizobiales      | Bradyrhizobiaceae      |                  | 0,00% | 0,28% | 0,44% | 0,60% | 0,30% | 0,34% | 0,28% | 0,13% | 0,35% | 0,32% | 0,32% |
| Bacteria                 | Proteobacteria | Alphaproteobacteria | Rhizobiales      | Bradyrhizobiaceae      |                  | 0,17% | 1,71% | 2,62% | 2,10% | 1,90% | 1,67% | 1,49% | 0,73% | 1,82% | 1,50% | 1,50% |
| Bacteria                 | Proteobacteria | Alphaproteobacteria | Rhizobiales      | Bradyrhizobiaceae      | Balneimonas      | 0,00% | 0,02% | 0,01% | 0,01% | 0,01% | 0,01% | 0,00% | 0,00% | 0,01% | 0,01% | 0,01% |
| Bacteria                 | Proteobacteria | Alphaproteobacteria | Rhizobiales      | Bradyrhizobiaceae      | Bosea            | 0,00% | 0,00% | 0,01% | 0,01% | 0,01% | 0,00% | 0,00% | 0,00% | 0,00% | 0,00% | 0,00% |
| Bacteria                 | Proteobacteria | Alphaproteobacteria | Rhizobiales      | Bradyrhizobiaceae      | Bradyrhizobium   | 0,00% | 0,04% | 0,04% | 0,05% | 0,03% | 0,03% | 0,03% | 0,00% | 0,03% | 0,02% | 0,02% |
| Bacteria                 | Proteobacteria | Alphaproteobacteria | Rhizobiales      | Brucellaceae           | Ochrobactrum     | 0,00% | 0,00% | 0,00% | 0,00% | 0,00% | 0,00% | 0,00% | 0,00% | 0,00% | 0,00% | 0,00% |
| Bacteria                 | Proteobacteria | Alphaproteobacteria | Rhizobiales      | Hyphomicrobiaceae      |                  | 0,00% | 0,00% | 0,00% | 0,00% | 0,00% | 0,00% | 0,00% | 0,00% | 0,00% | 0,00% | 0,00% |
| Bacteria                 | Proteobacteria | Alphaproteobacteria | Rhizobiales      | Hyphomicrobiaceae      |                  | 0,00% | 0,58% | 1,24% | 0,46% | 0,84% | 0,27% | 0,44% | 0,26% | 0,22% | 0,22% | 0,33% |
| Bacteria                 | Proteobacteria | Alphaproteobacteria | Rhizobiales      | Hyphomicrobiaceae      | Devosia          | 0,00% | 0,83% | 0,72% | 0,62% | 0,92% | 0,77% | 0,68% | 0,25% | 0,77% | 0,77% | 0,78% |
| Bacteria                 | Proteobacteria | Alphaproteobacteria | Rhizobiales      | Hyphomicrobiaceae      | Hyphomicrobium   | 0,00% | 0,12% | 0,14% | 0,12% | 0,10% | 0,05% | 0,07% | 0,04% | 0,05% | 0,05% | 0,05% |
| Bacteria                 | Proteobacteria | Alphaproteobacteria | Rhizobiales      | Hyphomicrobiaceae      | Parvibaculum     | 0,00% | 0,03% | 0,01% | 0,01% | 0,02% | 0,05% | 0,03% | 0,01% | 0,04% | 0,04% | 0,06% |
| Bacteria                 | Proteobacteria | Alphaproteobacteria | Rhizobiales      | Hyphomicrobiaceae      | Pedomicrobium    | 0,00% | 0,07% | 0,05% | 0,02% | 0,06% | 0,04% | 0,04% | 0,00% | 0,03% | 0,04% | 0,04% |
| Bacteria                 | Proteobacteria | Alphaproteobacteria | Rhizobiales      | Hyphomicrobiaceae      | Rhodoplanes      | 0,01% | 2,51% | 2,83% | 3,25% | 2,72% | 2,35% | 2,03% | 2,58% | 2,24% | 2,47% | 2,47% |
| Bacteria                 | Proteobacteria | Alphaproteobacteria | Rhizobiales      | Methylobacteriaceae    |                  | 1,29% | 0,02% | 0,03% | 0,10% | 0,03% | 0,01% | 0,00% | 0,05% | 0,02% | 0,01% | 0,01% |
| Bacteria                 | Proteobacteria | Alphaproteobacteria | Rhizobiales      | Methylobacteriaceae    | Methylobacterium | 3,91% | 0,08% | 0,09% | 2,24% | 0,07% | 0,04% | 0,03% | 0,08% | 0,05% | 0,03% | 0,03% |
| Bacteria                 | Proteobacteria | Alphaproteobacteria | Rhizobiales      | Methylocystaceae       |                  | 0,00% | 0,17% | 0,19% | 0,07% | 0,14% | 0,10% | 0,08% | 0,06% | 0,10% | 0,11% | 0,11% |
| Bacteria                 | Proteobacteria | Alphaproteobacteria | Rhizobiales      | Methylocystaceae       | Methylopila      | 0,00% | 0,00% | 0,00% | 0,00% | 0,00% | 0,00% | 0,00% | 0,00% | 0,00% | 0,00% | 0,00% |
| Bacteria                 | Proteobacteria | Alphaproteobacteria | Rhizobiales      | Phyllobacteriaceae     |                  | 0,00% | 0,19% | 0,25% | 0,91% | 0,24% | 0,18% | 0,11% | 0,10% | 0,18% | 0,19% | 0,19% |
| Bacteria                 | Proteobacteria | Alphaproteobacteria | Rhizobiales      | Phyllobacteriaceae     |                  | 0,00% | 0,07% | 0,09% | 0,21% | 0,08% | 0,06% | 0,03% | 0,01% | 0,06% | 0,06% | 0,06% |
| Bacteria                 | Proteobacteria | Alphaproteobacteria | Rhizobiales      | Phyllobacteriaceae     | Aminobacter      | 0,00% | 0,17% | 0,22% | 0,48% | 0,24% | 0,14% | 0,13% | 0,07% | 0,12% | 0,12% | 0,17% |
| Bacteria                 | Proteobacteria | Alphaproteobacteria | Rhizobiales      | Phyllobacteriaceae     | Mesorhizobium    | 0,00% | 0,58% | 0,98% | 2,35% | 0,83% | 0,67% | 0,39% | 0,29% | 0,58% | 0,77% | 0,77% |
| Bacteria                 | Proteobacteria | Alphaproteobacteria | Rhizobiales      | Phyllobacteriaceae     | Phyllobacterium  | 0,00% | 0,00% | 0,00% | 0,00% | 0,00% | 0,00% | 0,00% | 0,00% | 0,00% | 0,00% | 0,00% |
| Bacteria                 | Proteobacteria | Alphaproteobacteria | Rhizobiales      | Rhizobiaceae           |                  | 0,00% | 0,05% | 0,07% | 0,07% | 0,06% | 0,04% | 0,06% | 0,05% | 0,03% | 0,04% | 0,04% |
| Bacteria                 | Proteobacteria | Alphaproteobacteria | Rhizobiales      | Rhizobiaceae           |                  | 0,00% | 0,06% | 0,02% | 0,05% | 0,06% | 0,02% | 0,03% | 0,03% | 0,02% | 0,03% | 0,03% |
| Bacteria                 | Proteobacteria | Alphaproteobacteria | Rhizobiales      | Rhizobiaceae           | Agrobacterium    | 0,00% | 0,02% | 0,02% | 0,04% | 0,02% | 0,01% | 0,03% | 0,02% | 0,01% | 0,01% | 0,01% |
| Bacteria                 | Proteobacteria | Alphaproteobacteria | Rhizobiales      | Rhizobiaceae           | Kaistia          | 0,00% | 0,00% | 0,00% | 0,00% | 0,00% | 0,00% | 0,00% | 0,00% | 0,00% | 0,00% | 0,00% |
| Bacteria                 | Proteobacteria | Alphaproteobacteria | Rhizobiales      | Rhizobiaceae           | Rhizobium        | 0,00% | 0,20% | 0,43% | 0,93% | 0,30% | 0,21% | 0,27% | 0,19% | 0,19% | 0,23% | 0,23% |
| Bacteria                 | Proteobacteria | Alphaproteobacteria | Rhizobiales      | Rhodobiaceae           |                  | 0,00% | 0,00% | 0,00% | 0,00% | 0,00% | 0,00% | 0,00% | 0,00% | 0,00% | 0,00% | 0,00% |
| Bacteria                 | Proteobacteria | Alphaproteobacteria | Rhizobiales      | Rhodobiaceae           | Afifella         | 0,00% | 0,20% | 0,13% | 0,16% | 0,14% | 0,09% | 0,11% | 0,02% | 0,08% | 0,10% | 0,10% |
| Bacteria                 | Proteobacteria | Alphaproteobacteria | Rhizobiales      | Xanthobacteraceae      |                  | 0,00% | 0,00% | 0,00% | 0,00% | 0,00% | 0,00% | 0,00% | 0,00% | 0,00% | 0,00% | 0,00% |
| Bacteria                 | Proteobacteria | Alphaproteobacteria | Rhizobiales      | Xanthobacteraceae      | Labrys           | 0,00% | 0,18% | 0,22% | 0,23% | 0,18% | 0,17% | 0,08% | 0,12% | 0,17% | 0,16% | 0,16% |
| Bacteria                 | Proteobacteria | Alphaproteobacteria | Rhizobiales      | Xanthobacteraceae      | Xanthobacter     | 0,00% | 0,00% | 0,00% | 0,01% | 0,00% | 0,00% | 0,00% | 0,00% | 0,00% | 0,00% | 0,00% |
| Bacteria                 | Proteobacteria | Alphaproteobacteria | Rhodobacterales  | Hyphomonadaceae        |                  | 0,00% | 0,04% | 0,03% | 0,01% | 0,03% | 0,04% | 0,04% | 0,00% | 0,05% | 0,04% | 0,04% |
| Bacteria                 | Proteobacteria | Alphaproteobacteria | Rhodobacterales  | Rhodobacteraceae       |                  | 0,00% | 0,00% | 0,00% | 0,00% | 0,00% | 0,00% | 0,00% | 0,10% | 0,00% | 0,00% | 0,00% |
| Bacteria                 | Proteobacteria | Alphaproteobacteria | Rhodobacterales  | Rhodobacteraceae       |                  | 0,34% | 0,01% | 0,01% | 0,01% | 0,01% | 0,01% | 0,00% | 0,01% | 0,01% | 0,01% | 0,01% |
| Bacteria                 | Proteobacteria | Alphaproteobacteria | Rhodobacterales  | Rhodobacteraceae       | Amaricoccus      | 0,00% | 0,00% | 0,00% | 0,00% | 0,00% | 0,00% | 0,00% | 0,00% | 0,00% | 0,00% | 0,00% |
| Bacteria                 | Proteobacteria | Alphaproteobacteria | Rhodobacterales  | Rhodobacteraceae       | Paracoccus       | 0,01% | 0,00% | 0,00% | 0,04% | 0,00% | 0,00% | 0,00% | 0,04% | 0,00% | 0,00% | 0,00% |
| Bacteria                 | Proteobacteria | Alphaproteobacteria | Rhodobacterales  | Rhodobacteraceae       | Rhodobacter      | 0,00% | 0,00% | 0,00% | 0,00% | 0,00% | 0,00% | 0,00% | 0,00% | 0,00% | 0,00% | 0,00% |
| Bacteria                 | Proteobacteria | Alphaproteobacteria | Rhodobacterales  | Rhodobacteraceae       | Rubellimicrobium | 0,00% | 0,01% | 0,01% | 0,00% | 0,00% | 0,00% | 0,00% | 0,00% | 0,00% | 0,00% | 0,00% |
| Bacteria                 | Proteobacteria | Alphaproteobacteria | Rhodospirillales |                        |                  | 0,00% | 0,05% | 0,05% | 0,00% | 0,07% | 0,03% | 0,02% | 0,06% | 0,03% | 0,03% | 0,03% |
| Bacteria                 | Proteobacteria | Alphaproteobacteria | Rhodospirillales | Acetobacteraceae       |                  | 0,18% | 1,24% | 1,05% | 0,34% | 1,07% | 0,78% | 0,50% | 0,36% | 0,75% | 0,82% | 0,82% |
| Bacteria                 | Proteobacteria | Alphaproteobacteria | Rhodospirillales | Acetobacteraceae       | Acidisoma        | 0,00% | 0,03% | 0,01% | 0,01% | 0,02% | 0,02% | 0,01% | 0,00% | 0,02% | 0,02% | 0,02% |
| Bacteria                 | Proteobacteria | Alphaproteobacteria | Rhodospirillales | Acetobacteraceae       | Acidocella       | 0,59% | 0,00% | 0,00% | 0,00% | 0,00% | 0,00% | 0,00% | 0,00% | 0,00% | 0,00% | 0,00% |
| Bacteria                 | Proteobacteria | Alphaproteobacteria | Rhodospirillales | Acetobacteraceae       | Roseomonas       | 0,00% | 0,01% | 0,01% | 0,02% | 0,01% | 0,01% | 0,00% | 0,01% | 0,00% | 0,01% | 0,01% |
| Bacteria                 | Proteobacteria | Alphaproteobacteria | Rhodospirillales | Rhodospirillaceae      |                  | 0,00% | 1,94% | 1,23% | 2,25% | 1,67% | 1,51% | 1,32% | 0,70% | 1,32% | 1,75% | 1,75% |
| Bacteria                 | Proteobacteria | Alphaproteobacteria | Rhodospirillales | Rhodospirillaceae      | Azospirillum     | 0,00% | 0,00% | 0,00% | 0,00% | 0,00% | 0,00% | 0,00% | 0,00% | 0,00% | 0,00% | 0,00% |
| Bacteria                 | Proteobacteria | Alphaproteobacteria | Rhodospirillales | Rhodospirillaceae      | Inquillus        | 0,00% | 0,00% | 0,00% | 0,00% | 0,00% | 0,00% | 0,00% | 0,00% | 0,00% | 0,00% | 0,00% |
| Bacteria                 | Proteobacteria | Alphaproteobacteria | Rhodospirillales | Rhodospirillaceae      | Magnetospirillum | 0,00% | 0,00% | 0,00% | 0,00% | 0,00% | 0,00% | 0,00% | 0,00% | 0,00% | 0,00% | 0,00% |
| Bacteria                 | Proteobacteria | Alphaproteobacteria | Rhodospirillales | Rhodospirillaceae      | Skermanella      | 0,00% | 0,01% | 0,01% | 0,00% | 0,00% | 0,00% | 0,00% | 0,00% | 0,01% | 0,01% | 0,01% |
| Bacteria                 | Proteobacteria | Alphaproteobacteria | Rickettsiales    |                        |                  | 0,00% | 0,12% | 0,04% | 1,19% | 0,10% | 0,05% | 0,03% | 0,30% | 0,05% | 0,06% | 0,06% |



| Phylogenetic Analysis of Bacterial Diversity |                |                     |                   |                    |                   |                        |       |       |        |       |        |        |        |        |       |
|----------------------------------------------|----------------|---------------------|-------------------|--------------------|-------------------|------------------------|-------|-------|--------|-------|--------|--------|--------|--------|-------|
| Taxonomic Level                              | Phylum         | Class               | Order             | Family             | Genus             | Relative Abundance (%) |       |       |        |       |        |        |        |        |       |
|                                              |                |                     |                   |                    |                   | OTU1                   | OTU2  | OTU3  | OTU4   | OTU5  | OTU6   | OTU7   | OTU8   | OTU9   | OTU10 |
| Bacteria                                     | Proteobacteria | Alphaproteobacteria | Rickettsiales     | Rickettsiaceae     |                   | 0,00%                  | 0,00% | 0,00% | 0,01%  | 0,00% | 0,00%  | 0,00%  | 0,00%  | 0,00%  |       |
| Bacteria                                     | Proteobacteria | Alphaproteobacteria | Rickettsiales     | Rickettsiaceae     | Rickettsia        | 0,00%                  | 0,00% | 0,00% | 0,00%  | 0,00% | 0,00%  | 0,00%  | 0,00%  | 0,00%  |       |
| Bacteria                                     | Proteobacteria | Alphaproteobacteria | Rickettsiales     | Rickettsiaceae     | Wolbachia         | 0,00%                  | 0,00% | 0,00% | 0,00%  | 0,00% | 0,00%  | 0,00%  | 0,00%  | 0,00%  |       |
| Bacteria                                     | Proteobacteria | Alphaproteobacteria | Rickettsiales     | mitochondria       |                   | 0,24%                  | 0,03% | 0,06% | 0,00%  | 0,02% | 0,04%  | 0,01%  | 0,01%  | 0,04%  |       |
| Bacteria                                     | Proteobacteria | Alphaproteobacteria | Sphingomonadales  | Other              |                   | 0,00%                  | 0,04% | 0,02% | 0,02%  | 0,02% | 0,06%  | 0,04%  | 0,00%  | 0,05%  |       |
| Bacteria                                     | Proteobacteria | Alphaproteobacteria | Sphingomonadales  |                    |                   | 0,00%                  | 0,00% | 0,00% | 0,00%  | 0,00% | 0,00%  | 0,00%  | 0,00%  | 0,00%  |       |
| Bacteria                                     | Proteobacteria | Alphaproteobacteria | Sphingomonadales  | Erythrobacteraceae |                   | 0,00%                  | 0,00% | 0,00% | 0,00%  | 0,00% | 0,00%  | 0,00%  | 0,00%  | 0,00%  |       |
| Bacteria                                     | Proteobacteria | Alphaproteobacteria | Sphingomonadales  | Erythrobacteraceae |                   | 0,00%                  | 0,47% | 0,28% | 0,57%  | 0,33% | 0,73%  | 0,82%  | 0,57%  | 0,70%  |       |
| Bacteria                                     | Proteobacteria | Alphaproteobacteria | Sphingomonadales  | Sphingomonadaceae  |                   | 0,00%                  | 0,02% | 0,03% | 0,09%  | 0,04% | 0,02%  | 0,02%  | 0,00%  | 0,02%  |       |
| Bacteria                                     | Proteobacteria | Alphaproteobacteria | Sphingomonadales  | Sphingomonadaceae  |                   | 0,05%                  | 0,63% | 0,54% | 0,53%  | 0,57% | 1,03%  | 0,94%  | 0,24%  | 1,02%  |       |
| Bacteria                                     | Proteobacteria | Alphaproteobacteria | Sphingomonadales  | Sphingomonadaceae  | Blastomonas       | 0,00%                  | 0,00% | 0,00% | 0,00%  | 0,00% | 0,00%  | 0,00%  | 0,00%  | 0,00%  |       |
| Bacteria                                     | Proteobacteria | Alphaproteobacteria | Sphingomonadales  | Sphingomonadaceae  | Kaistobacter      | 0,14%                  | 6,79% | 4,59% | 23,68% | 4,54% | 19,58% | 18,03% | 48,91% | 21,47% |       |
| Bacteria                                     | Proteobacteria | Alphaproteobacteria | Sphingomonadales  | Sphingomonadaceae  | Novosphingobium   | 0,00%                  | 0,01% | 0,01% | 0,04%  | 0,01% | 0,02%  | 0,02%  | 0,01%  | 0,03%  |       |
| Bacteria                                     | Proteobacteria | Alphaproteobacteria | Sphingomonadales  | Sphingomonadaceae  | Sphingobium       | 0,00%                  | 0,02% | 0,02% | 0,03%  | 0,01% | 0,03%  | 0,03%  | 0,00%  | 0,03%  |       |
| Bacteria                                     | Proteobacteria | Alphaproteobacteria | Sphingomonadales  | Sphingomonadaceae  | Sphingomonas      | 3,41%                  | 1,12% | 1,39% | 1,62%  | 0,82% | 1,85%  | 2,07%  | 0,53%  | 1,82%  |       |
| Bacteria                                     | Proteobacteria | Alphaproteobacteria | Sphingomonadales  | Sphingomonadaceae  | Sphingopyxis      | 0,00%                  | 0,02% | 0,01% | 0,02%  | 0,01% | 0,02%  | 0,02%  | 0,00%  | 0,02%  |       |
| Bacteria                                     | Proteobacteria | Betaproteobacteria  | Other             |                    |                   | 0,00%                  | 0,00% | 0,00% | 0,00%  | 0,00% | 0,00%  | 0,00%  | 0,00%  | 0,00%  |       |
| Bacteria                                     | Proteobacteria | Betaproteobacteria  |                   |                    |                   | 0,00%                  | 0,10% | 0,03% | 0,06%  | 0,06% | 0,06%  | 0,06%  | 0,01%  | 0,06%  |       |
| Bacteria                                     | Proteobacteria | Betaproteobacteria  | A21b              | EB1003             |                   | 0,00%                  | 0,37% | 0,21% | 0,08%  | 0,31% | 0,33%  | 0,41%  | 0,07%  | 0,31%  |       |
| Bacteria                                     | Proteobacteria | Betaproteobacteria  | A21b              | UD5                |                   | 0,00%                  | 0,08% | 0,02% | 0,01%  | 0,08% | 0,05%  | 0,08%  | 0,00%  | 0,04%  |       |
| Bacteria                                     | Proteobacteria | Betaproteobacteria  | Burkholderiales   |                    |                   | 0,00%                  | 0,01% | 0,01% | 0,00%  | 0,01% | 0,02%  | 0,02%  | 0,01%  | 0,02%  |       |
| Bacteria                                     | Proteobacteria | Betaproteobacteria  | Burkholderiales   | Alcaligenaceae     |                   | 0,00%                  | 0,01% | 0,00% | 0,02%  | 0,00% | 0,01%  | 0,01%  | 0,03%  | 0,01%  |       |
| Bacteria                                     | Proteobacteria | Betaproteobacteria  | Burkholderiales   | Alcaligenaceae     | Achromobacter     | 0,00%                  | 0,00% | 0,00% | 0,00%  | 0,00% | 0,00%  | 0,00%  | 0,00%  | 0,00%  |       |
| Bacteria                                     | Proteobacteria | Betaproteobacteria  | Burkholderiales   | Burkholderiaceae   |                   | 0,00%                  | 0,00% | 0,00% | 0,00%  | 0,00% | 0,00%  | 0,00%  | 0,00%  | 0,00%  |       |
| Bacteria                                     | Proteobacteria | Betaproteobacteria  | Burkholderiales   | Burkholderiaceae   |                   | 0,00%                  | 0,22% | 0,35% | 0,17%  | 0,17% | 0,36%  | 0,28%  | 0,12%  | 0,39%  |       |
| Bacteria                                     | Proteobacteria | Betaproteobacteria  | Burkholderiales   | Burkholderiaceae   | Burkholderia      | 0,00%                  | 1,46% | 1,86% | 1,36%  | 1,11% | 1,67%  | 1,70%  | 0,60%  | 1,71%  |       |
| Bacteria                                     | Proteobacteria | Betaproteobacteria  | Burkholderiales   | Comamonadaceae     |                   | 0,00%                  | 0,04% | 0,04% | 0,03%  | 0,04% | 0,06%  | 0,07%  | 0,00%  | 0,06%  |       |
| Bacteria                                     | Proteobacteria | Betaproteobacteria  | Burkholderiales   | Comamonadaceae     |                   | 3,21%                  | 0,16% | 0,22% | 0,12%  | 0,16% | 0,23%  | 0,37%  | 0,44%  | 0,24%  |       |
| Bacteria                                     | Proteobacteria | Betaproteobacteria  | Burkholderiales   | Comamonadaceae     | Comamonas         | 0,00%                  | 0,00% | 0,00% | 0,00%  | 0,00% | 0,00%  | 0,00%  | 0,02%  | 0,00%  |       |
| Bacteria                                     | Proteobacteria | Betaproteobacteria  | Burkholderiales   | Comamonadaceae     | Delftia           | 0,04%                  | 0,00% | 0,00% | 0,03%  | 0,00% | 0,00%  | 0,00%  | 0,02%  | 0,00%  |       |
| Bacteria                                     | Proteobacteria | Betaproteobacteria  | Burkholderiales   | Comamonadaceae     | Methylibium       | 0,00%                  | 0,10% | 0,15% | 0,04%  | 0,11% | 0,21%  | 0,23%  | 0,04%  | 0,21%  |       |
| Bacteria                                     | Proteobacteria | Betaproteobacteria  | Burkholderiales   | Comamonadaceae     | Ramlibacter       | 0,00%                  | 0,03% | 0,02% | 0,03%  | 0,02% | 0,04%  | 0,04%  | 0,01%  | 0,04%  |       |
| Bacteria                                     | Proteobacteria | Betaproteobacteria  | Burkholderiales   | Comamonadaceae     | Rubrivivax        | 0,00%                  | 0,00% | 0,00% | 0,00%  | 0,00% | 0,00%  | 0,00%  | 0,00%  | 0,00%  |       |
| Bacteria                                     | Proteobacteria | Betaproteobacteria  | Burkholderiales   | Comamonadaceae     | Tepidimonas       | 0,28%                  | 0,00% | 0,00% | 0,00%  | 0,00% | 0,00%  | 0,00%  | 0,09%  | 0,00%  |       |
| Bacteria                                     | Proteobacteria | Betaproteobacteria  | Burkholderiales   | Comamonadaceae     | Variovorax        | 0,00%                  | 0,00% | 0,00% | 0,00%  | 0,00% | 0,01%  | 0,01%  | 0,01%  | 0,01%  |       |
| Bacteria                                     | Proteobacteria | Betaproteobacteria  | Burkholderiales   | Oxalobacteraceae   |                   | 0,00%                  | 0,01% | 0,01% | 0,01%  | 0,01% | 0,02%  | 0,15%  | 0,00%  | 0,02%  |       |
| Bacteria                                     | Proteobacteria | Betaproteobacteria  | Burkholderiales   | Oxalobacteraceae   |                   | 0,16%                  | 0,13% | 0,27% | 0,09%  | 0,13% | 0,34%  | 1,01%  | 0,08%  | 0,34%  |       |
| Bacteria                                     | Proteobacteria | Betaproteobacteria  | Burkholderiales   | Oxalobacteraceae   | Cupriavidus       | 0,00%                  | 0,00% | 0,00% | 0,00%  | 0,00% | 0,00%  | 0,00%  | 0,00%  | 0,00%  |       |
| Bacteria                                     | Proteobacteria | Betaproteobacteria  | Burkholderiales   | Oxalobacteraceae   | Janthinobacterium | 0,00%                  | 0,01% | 0,04% | 0,02%  | 0,01% | 0,05%  | 0,22%  | 0,04%  | 0,04%  |       |
| Bacteria                                     | Proteobacteria | Betaproteobacteria  | Burkholderiales   | Oxalobacteraceae   | Ralstonia         | 0,00%                  | 0,00% | 0,00% | 0,00%  | 0,01% | 0,00%  | 0,00%  | 0,00%  | 0,00%  |       |
| Bacteria                                     | Proteobacteria | Betaproteobacteria  | Ellin6067         |                    |                   | 0,00%                  | 0,25% | 0,08% | 0,30%  | 0,18% | 0,22%  | 0,25%  | 0,05%  | 0,20%  |       |
| Bacteria                                     | Proteobacteria | Betaproteobacteria  | Hydrogenophilales | Hydrogenophilaceae | Thiobacillus      | 0,00%                  | 0,00% | 0,00% | 0,00%  | 0,00% | 0,00%  | 0,00%  | 0,00%  | 0,00%  |       |
| Bacteria                                     | Proteobacteria | Betaproteobacteria  | MND1              |                    |                   | 0,00%                  | 0,12% | 0,06% | 0,05%  | 0,10% | 0,10%  | 0,09%  | 0,00%  | 0,11%  |       |
| Bacteria                                     | Proteobacteria | Betaproteobacteria  | Methylophilales   | Methylophilaceae   |                   | 0,00%                  | 0,00% | 0,00% | 0,01%  | 0,00% | 0,00%  | 0,00%  | 0,00%  | 0,00%  |       |
| Bacteria                                     | Proteobacteria | Betaproteobacteria  | Neisseriales      | Neisseriaceae      |                   | 0,36%                  | 0,00% | 0,00% | 0,00%  | 0,00% | 0,00%  | 0,00%  | 0,00%  | 0,00%  |       |
| Bacteria                                     | Proteobacteria | Betaproteobacteria  | Nitrosomonadales  | Nitrosomonadaceae  |                   | 0,00%                  | 0,00% | 0,00% | 0,00%  | 0,00% | 0,00%  | 0,00%  | 0,00%  | 0,00%  |       |
| Bacteria                                     | Proteobacteria | Betaproteobacteria  | Rhodocyclales     | Rhodocyclaceae     |                   | 0,00%                  | 0,00% | 0,00% | 0,00%  | 0,00% | 0,00%  | 0,00%  | 0,00%  | 0,00%  |       |
| Bacteria                                     | Proteobacteria | Betaproteobacteria  | Rhodocyclales     | Rhodocyclaceae     |                   | 0,00%                  | 0,00% | 0,00% | 0,00%  | 0,00% | 0,00%  | 0,00%  | 0,00%  | 0,00%  |       |
| Bacteria                                     | Proteobacteria | Betaproteobacteria  | Rhodocyclales     | Rhodocyclaceae     | Hydrogenophilus   | 0,04%                  | 0,00% | 0,00% | 0,00%  | 0,00% | 0,00%  | 0,00%  | 0,00%  | 0,00%  |       |
| Bacteria                                     | Proteobacteria | Betaproteobacteria  | Rhodocyclales     | Rhodocyclaceae     | Zoogloea          | 0,00%                  | 0,00% | 0,00% | 0,00%  | 0,00% | 0,00%  | 0,00%  | 0,01%  | 0,00%  |       |
| Bacteria                                     | Proteobacteria | Betaproteobacteria  | SC-I-84           |                    |                   | 0,00%                  | 0,80% | 0,32% | 0,10%  | 0,65% | 0,59%  | 0,75%  | 0,09%  | 0,56%  |       |
| Bacteria                                     | Proteobacteria | Deltaproteobacteria |                   |                    |                   | 0,00%                  | 0,00% | 0,00% | 0,00%  | 0,00% | 0,00%  | 0,00%  | 0,00%  | 0,00%  |       |
| Bacteria                                     | Proteobacteria | Deltaproteobacteria | Bdellovibrionales | Bacteriovoracaceae |                   | 0,00%                  | 0,01% | 0,01% | 0,00%  | 0,00% | 0,01%  | 0,01%  | 0,02%  | 0,01%  |       |

| Table 1: Bacterial community composition (OTUs) |                |                     |                      |                        |                  |       |       |       |       |       |       |       |       |       |       |
|-------------------------------------------------|----------------|---------------------|----------------------|------------------------|------------------|-------|-------|-------|-------|-------|-------|-------|-------|-------|-------|
| OTU                                             | Phylum         | Class               | Order                | Family                 | Genus            | OTU1  | OTU2  | OTU3  | OTU4  | OTU5  | OTU6  | OTU7  | OTU8  | OTU9  | OTU10 |
| Bacteria                                        | Proteobacteria | Deltaproteobacteria | Bdellovibrionales    | Bdellovibrionaceae     | Bdellovibrio     | 0,00% | 0,11% | 0,06% | 0,02% | 0,06% | 0,08% | 0,11% | 0,04% | 0,08% | 0,09% |
| Bacteria                                        | Proteobacteria | Deltaproteobacteria | MIZ46                |                        |                  | 0,00% | 0,03% | 0,01% | 0,00% | 0,02% | 0,02% | 0,02% | 0,01% | 0,02% | 0,02% |
| Bacteria                                        | Proteobacteria | Deltaproteobacteria | Myxococcales         | Other                  |                  | 0,00% | 0,01% | 0,02% | 0,00% | 0,01% | 0,01% | 0,01% | 0,00% | 0,01% | 0,01% |
| Bacteria                                        | Proteobacteria | Deltaproteobacteria | Myxococcales         |                        |                  | 0,00% | 0,87% | 1,07% | 0,29% | 0,97% | 0,72% | 1,78% | 0,22% | 0,66% | 0,80% |
| Bacteria                                        | Proteobacteria | Deltaproteobacteria | Myxococcales         | 0319-6G20              |                  | 0,00% | 0,03% | 0,01% | 0,02% | 0,02% | 0,02% | 0,03% | 0,01% | 0,02% | 0,02% |
| Bacteria                                        | Proteobacteria | Deltaproteobacteria | Myxococcales         | Cystobacterineae       |                  | 0,00% | 0,00% | 0,00% | 0,00% | 0,00% | 0,00% | 0,00% | 0,00% | 0,00% | 0,00% |
| Bacteria                                        | Proteobacteria | Deltaproteobacteria | Myxococcales         | Haliangiaceae          |                  | 0,00% | 0,43% | 0,27% | 0,03% | 0,36% | 0,37% | 0,28% | 0,03% | 0,36% | 0,39% |
| Bacteria                                        | Proteobacteria | Deltaproteobacteria | Myxococcales         | Myxococcaceae          |                  | 0,00% | 0,01% | 0,00% | 0,00% | 0,00% | 0,00% | 0,01% | 0,00% | 0,00% | 0,00% |
| Bacteria                                        | Proteobacteria | Deltaproteobacteria | Myxococcales         | Myxococcaceae          | Myxococcus       | 0,00% | 0,00% | 0,00% | 0,00% | 0,00% | 0,00% | 0,00% | 0,00% | 0,00% | 0,00% |
| Bacteria                                        | Proteobacteria | Deltaproteobacteria | Myxococcales         | Nannocystaceae         | Nannocystis      | 0,00% | 0,00% | 0,00% | 0,00% | 0,00% | 0,00% | 0,00% | 0,00% | 0,00% | 0,00% |
| Bacteria                                        | Proteobacteria | Deltaproteobacteria | Myxococcales         | OM27                   |                  | 0,00% | 0,00% | 0,00% | 0,00% | 0,00% | 0,00% | 0,00% | 0,00% | 0,00% | 0,00% |
| Bacteria                                        | Proteobacteria | Deltaproteobacteria | Myxococcales         | Polyangiaceae          |                  | 0,00% | 0,00% | 0,00% | 0,00% | 0,00% | 0,00% | 0,00% | 0,00% | 0,00% | 0,00% |
| Bacteria                                        | Proteobacteria | Deltaproteobacteria | Spirobacillales      |                        |                  | 0,00% | 0,01% | 0,01% | 0,00% | 0,01% | 0,01% | 0,00% | 0,00% | 0,01% | 0,01% |
| Bacteria                                        | Proteobacteria | Deltaproteobacteria | Syntrophobacteriales | Syntrophobacteraceae   |                  | 0,00% | 0,13% | 0,08% | 0,02% | 0,10% | 0,10% | 0,10% | 0,02% | 0,10% | 0,10% |
| Bacteria                                        | Proteobacteria | Gammaproteobacteria |                      |                        |                  | 0,00% | 0,00% | 0,00% | 0,00% | 0,01% | 0,00% | 0,00% | 0,00% | 0,00% | 0,00% |
| Bacteria                                        | Proteobacteria | Gammaproteobacteria | Aeromonadales        | Aeromonadaceae         |                  | 0,00% | 0,00% | 0,00% | 0,01% | 0,00% | 0,00% | 0,00% | 0,00% | 0,00% | 0,00% |
| Bacteria                                        | Proteobacteria | Gammaproteobacteria | Alteromonadales      | 211ds20                |                  | 0,00% | 0,00% | 0,00% | 0,00% | 0,00% | 0,00% | 0,00% | 0,00% | 0,00% | 0,00% |
| Bacteria                                        | Proteobacteria | Gammaproteobacteria | Alteromonadales      | Alteromonadaceae       | Cellvibrio       | 0,00% | 0,00% | 0,03% | 0,00% | 0,01% | 0,01% | 0,04% | 0,01% | 0,00% | 0,01% |
| Bacteria                                        | Proteobacteria | Gammaproteobacteria | Alteromonadales      | Alteromonadaceae       | HB2-32-21        | 0,00% | 0,00% | 0,00% | 0,01% | 0,00% | 0,00% | 0,00% | 0,02% | 0,00% | 0,00% |
| Bacteria                                        | Proteobacteria | Gammaproteobacteria | Alteromonadales      | Alteromonadaceae       | Marinobacter     | 4,35% | 0,00% | 0,00% | 0,00% | 0,00% | 0,00% | 0,00% | 0,02% | 0,00% | 0,00% |
| Bacteria                                        | Proteobacteria | Gammaproteobacteria | Alteromonadales      | [Chromatiaceae]        | Rheinheimera     | 0,00% | 0,00% | 0,00% | 0,00% | 0,00% | 0,00% | 0,00% | 0,00% | 0,00% | 0,00% |
| Bacteria                                        | Proteobacteria | Gammaproteobacteria | Chromatiales         | Other                  |                  | 0,00% | 0,16% | 0,38% | 0,02% | 0,36% | 0,42% | 0,28% | 0,07% | 0,40% | 0,45% |
| Bacteria                                        | Proteobacteria | Gammaproteobacteria | Chromatiales         |                        |                  | 0,00% | 0,00% | 0,00% | 0,00% | 0,00% | 0,00% | 0,00% | 0,00% | 0,00% | 0,00% |
| Bacteria                                        | Proteobacteria | Gammaproteobacteria | Chromatiales         | Ectothiorhodospiraceae |                  | 0,00% | 0,07% | 0,04% | 0,02% | 0,09% | 0,16% | 0,06% | 0,05% | 0,14% | 0,19% |
| Bacteria                                        | Proteobacteria | Gammaproteobacteria | Enterobacteriales    | Enterobacteriaceae     |                  | 0,00% | 0,00% | 0,00% | 0,01% | 0,00% | 0,00% | 0,00% | 0,00% | 0,00% | 0,00% |
| Bacteria                                        | Proteobacteria | Gammaproteobacteria | Enterobacteriales    | Enterobacteriaceae     |                  | 0,00% | 0,00% | 0,00% | 0,03% | 0,00% | 0,00% | 0,00% | 0,04% | 0,00% | 0,00% |
| Bacteria                                        | Proteobacteria | Gammaproteobacteria | Enterobacteriales    | Enterobacteriaceae     | Enterobacter     | 0,00% | 0,00% | 0,00% | 0,00% | 0,00% | 0,00% | 0,00% | 0,00% | 0,00% | 0,00% |
| Bacteria                                        | Proteobacteria | Gammaproteobacteria | Enterobacteriales    | Enterobacteriaceae     | Erwinia          | 0,00% | 0,00% | 0,00% | 0,03% | 0,00% | 0,00% | 0,00% | 0,01% | 0,00% | 0,00% |
| Bacteria                                        | Proteobacteria | Gammaproteobacteria | Enterobacteriales    | Enterobacteriaceae     | Serratia         | 0,00% | 0,00% | 0,00% | 0,00% | 0,00% | 0,00% | 0,00% | 0,00% | 0,00% | 0,00% |
| Bacteria                                        | Proteobacteria | Gammaproteobacteria | Legionellales        |                        |                  | 0,00% | 0,00% | 0,00% | 0,00% | 0,01% | 0,00% | 0,00% | 0,00% | 0,00% | 0,00% |
| Bacteria                                        | Proteobacteria | Gammaproteobacteria | Legionellales        | Coxiellaceae           |                  | 0,00% | 0,03% | 0,02% | 0,47% | 0,03% | 0,04% | 0,03% | 0,75% | 0,03% | 0,05% |
| Bacteria                                        | Proteobacteria | Gammaproteobacteria | Legionellales        | Coxiellaceae           | Aquicella        | 0,00% | 0,02% | 0,02% | 0,64% | 0,02% | 0,03% | 0,02% | 0,77% | 0,02% | 0,03% |
| Bacteria                                        | Proteobacteria | Gammaproteobacteria | Legionellales        | Coxiellaceae           | Rickettsiella    | 0,00% | 0,00% | 0,00% | 0,00% | 0,00% | 0,00% | 0,00% | 0,02% | 0,00% | 0,00% |
| Bacteria                                        | Proteobacteria | Gammaproteobacteria | Legionellales        | Legionellaceae         |                  | 0,00% | 0,00% | 0,00% | 0,01% | 0,00% | 0,00% | 0,00% | 0,00% | 0,00% | 0,00% |
| Bacteria                                        | Proteobacteria | Gammaproteobacteria | Legionellales        | Legionellaceae         |                  | 0,04% | 0,01% | 0,00% | 0,04% | 0,00% | 0,00% | 0,00% | 0,01% | 0,00% | 0,00% |
| Bacteria                                        | Proteobacteria | Gammaproteobacteria | Legionellales        | Legionellaceae         | Legionella       | 1,70% | 0,04% | 0,03% | 0,48% | 0,04% | 0,01% | 0,01% | 0,20% | 0,01% | 0,01% |
| Bacteria                                        | Proteobacteria | Gammaproteobacteria | Legionellales        | Legionellaceae         | Tatlockia        | 0,00% | 0,00% | 0,00% | 0,05% | 0,00% | 0,00% | 0,00% | 0,00% | 0,00% | 0,00% |
| Bacteria                                        | Proteobacteria | Gammaproteobacteria | Oceanospirillales    | Alcanivoracaceae       | Alcanivorax      | 0,00% | 0,00% | 0,00% | 0,00% | 0,00% | 0,00% | 0,00% | 0,00% | 0,00% | 0,00% |
| Bacteria                                        | Proteobacteria | Gammaproteobacteria | Oceanospirillales    | Halomonadaceae         | Chromohalobacter | 0,53% | 0,00% | 0,00% | 0,00% | 0,00% | 0,00% | 0,00% | 0,00% | 0,00% | 0,00% |
| Bacteria                                        | Proteobacteria | Gammaproteobacteria | Oceanospirillales    | Halomonadaceae         | Halomonas        | 0,97% | 0,00% | 0,00% | 0,00% | 0,00% | 0,00% | 0,00% | 0,01% | 0,00% | 0,00% |
| Bacteria                                        | Proteobacteria | Gammaproteobacteria | PYR10d3              |                        |                  | 0,00% | 0,03% | 0,01% | 0,00% | 0,03% | 0,03% | 0,02% | 0,00% | 0,03% | 0,03% |
| Bacteria                                        | Proteobacteria | Gammaproteobacteria | Pasteurellales       | Pasteurellaceae        | Actinobacillus   | 0,00% | 0,00% | 0,00% | 0,00% | 0,00% | 0,00% | 0,00% | 0,00% | 0,00% | 0,00% |
| Bacteria                                        | Proteobacteria | Gammaproteobacteria | Pasteurellales       | Pasteurellaceae        | Haemophilus      | 0,00% | 0,00% | 0,00% | 0,00% | 0,00% | 0,00% | 0,00% | 0,02% | 0,00% | 0,00% |
| Bacteria                                        | Proteobacteria | Gammaproteobacteria | Pseudomonadales      | Moraxellaceae          |                  | 0,00% | 0,00% | 0,00% | 0,04% | 0,00% | 0,00% | 0,00% | 0,00% | 0,00% | 0,00% |
| Bacteria                                        | Proteobacteria | Gammaproteobacteria | Pseudomonadales      | Moraxellaceae          | Acinetobacter    | 1,73% | 0,00% | 0,00% | 0,09% | 0,00% | 0,00% | 0,02% | 0,64% | 0,00% | 0,01% |
| Bacteria                                        | Proteobacteria | Gammaproteobacteria | Pseudomonadales      | Moraxellaceae          | Alkanindiges     | 3,18% | 0,00% | 0,00% | 0,00% | 0,00% | 0,00% | 0,00% | 0,00% | 0,00% | 0,00% |
| Bacteria                                        | Proteobacteria | Gammaproteobacteria | Pseudomonadales      | Moraxellaceae          | Enhydrobacter    | 0,00% | 0,00% | 0,00% | 0,56% | 0,00% | 0,00% | 0,00% | 0,02% | 0,00% | 0,00% |
| Bacteria                                        | Proteobacteria | Gammaproteobacteria | Pseudomonadales      | Moraxellaceae          | Perlucidibaca    | 0,00% | 0,00% | 0,00% | 0,00% | 0,00% | 0,00% | 0,00% | 0,00% | 0,00% | 0,00% |
| Bacteria                                        | Proteobacteria | Gammaproteobacteria | Pseudomonadales      | Pseudomonadaceae       |                  | 0,00% | 0,00% | 0,00% | 0,00% | 0,00% | 0,00% | 0,00% | 0,00% | 0,00% | 0,00% |
| Bacteria                                        | Proteobacteria | Gammaproteobacteria | Pseudomonadales      | Pseudomonadaceae       |                  | 0,00% | 0,00% | 0,00% | 0,00% | 0,00% | 0,00% | 0,00% | 0,00% | 0,00% | 0,00% |
| Bacteria                                        | Proteobacteria | Gammaproteobacteria | Pseudomonadales      | Pseudomonadaceae       | Pseudomonas      | 1,08% | 0,05% | 0,15% | 0,63% | 0,04% | 0,16% | 0,21% | 0,04% | 0,16% | 0,15% |
| Bacteria                                        | Proteobacteria | Gammaproteobacteria | Salinisphaerales     | Salinisphaeraceae      | Salinisphaera    | 0,15% | 0,00% | 0,00% | 0,00% | 0,00% | 0,00% | 0,00% | 0,00% | 0,00% | 0,00% |
| Bacteria                                        | Proteobacteria | Gammaproteobacteria | Thiotrichales        | Piscirickettsiaceae    |                  | 0,00% | 0,03% | 0,03% | 0,01% | 0,02% | 0,02% | 0,02% | 0,01% | 0,03% | 0,02% |

| Taxonomic Classification and Relative Abundance |                 |                     |                      |       |                       |                              |           |           |           |           |           |           |           |           |       |       |
|-------------------------------------------------|-----------------|---------------------|----------------------|-------|-----------------------|------------------------------|-----------|-----------|-----------|-----------|-----------|-----------|-----------|-----------|-------|-------|
| Phylum                                          | Class           | Order               | Class                | Order | Family                | Genus                        | Abundance | Abundance | Abundance | Abundance | Abundance | Abundance | Abundance | Abundance |       |       |
| Bacteria                                        | Proteobacteria  | Gammaproteobacteria | Xanthomonadales      |       | Sinobacteraceae       |                              | 0,00%     | 0,44%     | 0,98%     | 0,23%     | 0,50%     | 0,57%     | 0,80%     | 0,20%     | 0,58% | 0,56% |
| Bacteria                                        | Proteobacteria  | Gammaproteobacteria | Xanthomonadales      |       | Sinobacteraceae       | Steroidobacter               | 0,00%     | 0,02%     | 0,06%     | 0,01%     | 0,04%     | 0,03%     | 0,04%     | 0,02%     | 0,04% | 0,03% |
| Bacteria                                        | Proteobacteria  | Gammaproteobacteria | Xanthomonadales      |       | Xanthomonadaceae      |                              | 0,00%     | 0,15%     | 0,21%     | 0,27%     | 0,12%     | 0,38%     | 1,03%     | 0,08%     | 0,38% | 0,37% |
| Bacteria                                        | Proteobacteria  | Gammaproteobacteria | Xanthomonadales      |       | Xanthomonadaceae      |                              | 0,00%     | 1,84%     | 1,82%     | 1,71%     | 1,50%     | 3,16%     | 5,37%     | 0,90%     | 3,07% | 3,25% |
| Bacteria                                        | Proteobacteria  | Gammaproteobacteria | Xanthomonadales      |       | Xanthomonadaceae      | Dokdonella                   | 0,00%     | 0,35%     | 0,73%     | 0,24%     | 0,58%     | 0,80%     | 0,64%     | 0,15%     | 0,88% | 0,71% |
| Bacteria                                        | Proteobacteria  | Gammaproteobacteria | Xanthomonadales      |       | Xanthomonadaceae      | Luteibacter                  | 0,00%     | 0,00%     | 0,01%     | 0,01%     | 0,00%     | 0,01%     | 0,02%     | 0,00%     | 0,01% | 0,01% |
| Bacteria                                        | Proteobacteria  | Gammaproteobacteria | Xanthomonadales      |       | Xanthomonadaceae      | Luteimonas                   | 0,00%     | 0,02%     | 0,02%     | 0,05%     | 0,02%     | 0,04%     | 0,11%     | 0,01%     | 0,04% | 0,04% |
| Bacteria                                        | Proteobacteria  | Gammaproteobacteria | Xanthomonadales      |       | Xanthomonadaceae      | Lysobacter                   | 0,00%     | 0,01%     | 0,01%     | 0,02%     | 0,01%     | 0,03%     | 0,03%     | 0,01%     | 0,03% | 0,02% |
| Bacteria                                        | Proteobacteria  | Gammaproteobacteria | Xanthomonadales      |       | Xanthomonadaceae      | Rhodanobacter                | 0,00%     | 0,24%     | 0,63%     | 0,62%     | 0,25%     | 0,62%     | 1,93%     | 0,15%     | 0,67% | 0,55% |
| Bacteria                                        | Proteobacteria  | Gammaproteobacteria | Xanthomonadales      |       | Xanthomonadaceae      | Stenotrophomonas             | 0,00%     | 0,00%     | 0,00%     | 0,02%     | 0,00%     | 0,00%     | 0,01%     | 0,01%     | 0,01% | 0,00% |
| Bacteria                                        | Proteobacteria  | Gammaproteobacteria | Xanthomonadales      |       | Xanthomonadaceae      | Xanthomonas                  | 0,00%     | 0,00%     | 0,00%     | 0,00%     | 0,00%     | 0,00%     | 0,00%     | 0,00%     | 0,00% | 0,00% |
| Bacteria                                        | Proteobacteria  | TA18                | CV90                 |       |                       |                              | 0,00%     | 0,00%     | 0,00%     | 0,00%     | 0,00%     | 0,00%     | 0,00%     | 0,00%     | 0,00% | 0,00% |
| Bacteria                                        | Proteobacteria  | TA18                | PHOS-HD29            |       |                       |                              | 0,00%     | 0,00%     | 0,00%     | 0,01%     | 0,00%     | 0,00%     | 0,00%     | 0,00%     | 0,00% | 0,00% |
| Bacteria                                        | Spirochaetes    | Spirochaetes        | Spirochaetales       |       | Spirochaetaceae       | Spirochaeta                  | 0,00%     | 0,00%     | 0,00%     | 0,00%     | 0,00%     | 0,00%     | 0,00%     | 0,00%     | 0,00% | 0,00% |
| Bacteria                                        | TM6             | SJA-4               |                      |       |                       |                              | 0,00%     | 0,14%     | 0,10%     | 0,29%     | 0,10%     | 0,09%     | 0,09%     | 0,16%     | 0,09% | 0,08% |
| Bacteria                                        | TM6             | SJA-4               | S1198                |       |                       |                              | 0,00%     | 0,00%     | 0,00%     | 0,01%     | 0,00%     | 0,00%     | 0,00%     | 0,00%     | 0,00% | 0,00% |
| Bacteria                                        | TM6             | SJA-4               | YJF2-48              |       |                       |                              | 0,00%     | 0,00%     | 0,00%     | 0,00%     | 0,00%     | 0,00%     | 0,00%     | 0,00%     | 0,00% | 0,00% |
| Bacteria                                        | TM7             |                     |                      |       |                       |                              | 0,00%     | 0,00%     | 0,00%     | 0,02%     | 0,00%     | 0,00%     | 0,00%     | 0,03%     | 0,00% | 0,00% |
| Bacteria                                        | TM7             | MJK10               |                      |       |                       |                              | 0,00%     | 0,00%     | 0,00%     | 0,00%     | 0,00%     | 0,00%     | 0,00%     | 0,00%     | 0,00% | 0,00% |
| Bacteria                                        | TM7             | SC3                 |                      |       |                       |                              | 0,00%     | 0,03%     | 0,02%     | 0,08%     | 0,03%     | 0,05%     | 0,07%     | 0,13%     | 0,05% | 0,05% |
| Bacteria                                        | TM7             | TM7-1               |                      |       |                       |                              | 0,00%     | 0,35%     | 0,20%     | 1,66%     | 0,28%     | 0,46%     | 0,46%     | 0,97%     | 0,50% | 0,43% |
| Bacteria                                        | TM7             | TM7-3               |                      |       |                       |                              | 0,00%     | 0,07%     | 0,06%     | 0,57%     | 0,07%     | 0,12%     | 0,12%     | 0,61%     | 0,12% | 0,11% |
| Bacteria                                        | TM7             | TM7-3               | EW055                |       |                       |                              | 0,00%     | 0,08%     | 0,04%     | 0,18%     | 0,07%     | 0,10%     | 0,15%     | 0,40%     | 0,11% | 0,09% |
| Bacteria                                        | TM7             | TM7-3               | I025                 |       |                       |                              | 0,00%     | 0,02%     | 0,01%     | 0,03%     | 0,01%     | 0,03%     | 0,02%     | 0,01%     | 0,03% | 0,02% |
| Bacteria                                        | Tenericutes     | Mollicutes          | Anaeroplasmatales    |       | Anaeroplasmataceae    |                              | 0,00%     | 0,00%     | 0,00%     | 0,00%     | 0,00%     | 0,00%     | 0,01%     | 0,00%     | 0,00% | 0,00% |
| Bacteria                                        | Tenericutes     | Mollicutes          | Anaeroplasmatales    |       | Anaeroplasmataceae    | Asteroleplasma               | 0,00%     | 0,01%     | 0,03%     | 0,00%     | 0,01%     | 0,01%     | 0,01%     | 0,00%     | 0,01% | 0,01% |
| Bacteria                                        | Verrucomicrobia | Opitutae            |                      |       |                       |                              | 0,00%     | 0,00%     | 0,00%     | 0,00%     | 0,00%     | 0,00%     | 0,00%     | 0,00%     | 0,00% | 0,00% |
| Bacteria                                        | Verrucomicrobia | Opitutae            | Opituales            |       | Opitutaceae           |                              | 0,00%     | 0,03%     | 0,03%     | 0,04%     | 0,02%     | 0,03%     | 0,06%     | 0,01%     | 0,04% | 0,03% |
| Bacteria                                        | Verrucomicrobia | Opitutae            | Opituales            |       | Opitutaceae           | Opitutus                     | 0,00%     | 0,26%     | 0,16%     | 0,08%     | 0,18%     | 0,23%     | 0,29%     | 0,11%     | 0,23% | 0,22% |
| Bacteria                                        | Verrucomicrobia | Verrucomicrobiae    | Verrucomicrobiales   |       | Verrucomicrobiaceae   |                              | 0,00%     | 0,01%     | 0,01%     | 0,01%     | 0,00%     | 0,01%     | 0,00%     | 0,00%     | 0,00% | 0,01% |
| Bacteria                                        | Verrucomicrobia | Verrucomicrobiae    | Verrucomicrobiales   |       | Verrucomicrobiaceae   | Luteolibacter                | 0,00%     | 0,01%     | 0,01%     | 0,00%     | 0,01%     | 0,01%     | 0,02%     | 0,01%     | 0,01% | 0,01% |
| Bacteria                                        | Verrucomicrobia | Verrucomicrobiae    | Verrucomicrobiales   |       | Verrucomicrobiaceae   | Prostheco bacter             | 0,00%     | 0,00%     | 0,00%     | 0,00%     | 0,00%     | 0,00%     | 0,00%     | 0,01%     | 0,00% | 0,00% |
| Bacteria                                        | Verrucomicrobia | [Methylacidiphilae] | Methylacidiphilales  |       |                       |                              | 0,00%     | 0,01%     | 0,00%     | 0,00%     | 0,01%     | 0,01%     | 0,01%     | 0,00%     | 0,01% | 0,01% |
| Bacteria                                        | Verrucomicrobia | [Pedosphaerae]      | [Pedosphaerales]     |       |                       |                              | 0,00%     | 0,18%     | 0,11%     | 0,03%     | 0,11%     | 0,13%     | 0,15%     | 0,05%     | 0,13% | 0,15% |
| Bacteria                                        | Verrucomicrobia | [Pedosphaerae]      | [Pedosphaerales]     |       | Ellin515              |                              | 0,00%     | 0,12%     | 0,03%     | 0,02%     | 0,07%     | 0,06%     | 0,05%     | 0,02%     | 0,06% | 0,06% |
| Bacteria                                        | Verrucomicrobia | [Pedosphaerae]      | [Pedosphaerales]     |       | Ellin517              |                              | 0,00%     | 0,03%     | 0,01%     | 0,01%     | 0,02%     | 0,01%     | 0,01%     | 0,00%     | 0,02% | 0,01% |
| Bacteria                                        | Verrucomicrobia | [Pedosphaerae]      | [Pedosphaerales]     |       | auto67                | 4W                           | 0,00%     | 0,19%     | 0,13%     | 0,02%     | 0,10%     | 0,16%     | 0,12%     | 0,00%     | 0,16% | 0,16% |
| Bacteria                                        | Verrucomicrobia | [Spartobacteria]    | [Chthoniobacterales] |       | 01D2Z36               |                              | 0,00%     | 0,00%     | 0,00%     | 0,00%     | 0,00%     | 0,00%     | 0,00%     | 0,00%     | 0,00% | 0,00% |
| Bacteria                                        | Verrucomicrobia | [Spartobacteria]    | [Chthoniobacterales] |       | [Chthoniobacteraceae] |                              | 0,00%     | 0,01%     | 0,00%     | 0,00%     | 0,01%     | 0,00%     | 0,01%     | 0,00%     | 0,00% | 0,01% |
| Bacteria                                        | Verrucomicrobia | [Spartobacteria]    | [Chthoniobacterales] |       | [Chthoniobacteraceae] | Candidatus Xiphinematobacter | 0,00%     | 0,05%     | 0,03%     | 0,16%     | 0,03%     | 0,03%     | 0,02%     | 0,03%     | 0,03% | 0,03% |
| Bacteria                                        | Verrucomicrobia | [Spartobacteria]    | [Chthoniobacterales] |       | [Chthoniobacteraceae] | Chthoniobacter               | 0,00%     | 0,01%     | 0,00%     | 0,01%     | 0,01%     | 0,01%     | 0,01%     | 0,00%     | 0,01% | 0,01% |
| Bacteria                                        | Verrucomicrobia | [Spartobacteria]    | [Chthoniobacterales] |       | [Chthoniobacteraceae] | DA101                        | 0,00%     | 0,55%     | 0,49%     | 0,24%     | 0,37%     | 0,45%     | 0,61%     | 0,10%     | 0,46% | 0,44% |
| Bacteria                                        | Verrucomicrobia | [Spartobacteria]    | [Chthoniobacterales] |       | [Chthoniobacteraceae] | Ellin506                     | 0,00%     | 0,00%     | 0,00%     | 0,00%     | 0,00%     | 0,00%     | 0,00%     | 0,00%     | 0,00% | 0,00% |
| Bacteria                                        | Verrucomicrobia | [Spartobacteria]    | [Chthoniobacterales] |       | [Chthoniobacteraceae] | OR-59                        | 0,00%     | 0,00%     | 0,00%     | 0,00%     | 0,00%     | 0,00%     | 0,00%     | 0,00%     | 0,00% | 0,00% |
| Bacteria                                        | WPS-2           |                     |                      |       |                       |                              | 0,00%     | 0,15%     | 0,13%     | 1,39%     | 0,22%     | 0,43%     | 0,43%     | 0,55%     | 0,34% | 0,52% |
| Bacteria                                        | WS2             | SHA-109             |                      |       |                       |                              | 0,00%     | 0,01%     | 0,00%     | 0,03%     | 0,01%     | 0,01%     | 0,01%     | 0,00%     | 0,02% | 0,01% |
| Bacteria                                        | [Thermi]        | Deinococci          | Deinococcales        |       | Deinococcaceae        | Deinococcus                  | 0,00%     | 0,01%     | 0,03%     | 0,00%     | 0,01%     | 0,02%     | 0,01%     | 0,02%     | 0,02% | 0,01% |
| Bacteria                                        | [Thermi]        | Deinococci          | Thermales            |       | Thermaceae            | Thermus                      | 6,97%     | 0,00%     | 0,00%     | 0,00%     | 0,00%     | 0,00%     | 0,00%     | 0,03%     | 0,00% | 0,00% |
