# Supplementary material for: The choice of the DNA extraction method may influence the outcome of the soil microbial community structure analysis
Source: PubMed Central journal article supplement (PMC5552907; doi:10.1002/mbo3.453), 2017-02-20
Supplement: MBO3-6-na-s003.pdf [file MBO3-6-na-s003.pdf]

**Supplementary Table 3.** Statistical differences among each phyla between extraction protocols characterized by the Kruskla-Wallis test and p-values.

| <b>Phylum</b>    | <b>Kruskla-Wallis</b> | <b>p-value</b> |
|------------------|-----------------------|----------------|
| Actinobacteria   | 24.78042328           | 0.000829884    |
| Planctomycetes   | 24.74714751           | 0.000841211    |
| TM7              | 24.49424936           | 0.000932386    |
| Verrucomicrobia  | 24.06286997           | 0.001110718    |
| WPS-2            | 23.52532355           | 0.001380106    |
| Bacteroidetes    | 22.68518519           | 0.001933587    |
| Proteobacteria   | 22.12698413           | 0.002415454    |
| Tenericutes      | 21.7247765            | 0.002833225    |
| Firmicutes       | 21.53439153           | 0.003054719    |
| Nitrospirae      | 21.22794194           | 0.003447034    |
| Chloroflexi      | 20.88468193           | 0.003944628    |
| Chlorobi         | 20.8753216            | 0.003959129    |
| Gemmatimonadetes | 20.65974555           | 0.004307776    |
| Armatimonadetes  | 19.84905564           | 0.005905115    |
| Acidobacteria    | 19.61640212           | 0.00646066     |
| Crenarchaeota    | 18.10630631           | 0.011499466    |
| TM6              | 18.01506332           | 0.011902224    |
| OD1              | 17.84642127           | 0.012682471    |
| Chlamydiae       | 17.10534887           | 0.016729357    |
| OP11             | 16.84874389           | 0.018397981    |
| Elusimicrobia    | 16.48509485           | 0.021035743    |
| FBP              | 15.91037687           | 0.025947903    |
| MVP-21           | 14.84088778           | 0.038093946    |
| WS2              | 14.25932364           | 0.046756641    |
| Fibrobacteres    | 13.89067254           | 0.053160367    |
| Cyanobacteria    | 13.01984733           | 0.071626289    |
| AD3              | 9.982637583           | 0.189559517    |
| Fusobacteria     | 8                     | 0.332593903    |
| [Thermi]         | 7.320656111           | 0.396273917    |
| Euryarchaeota    | 7.282051282           | 0.400115405    |
| BRC1             | 7.282051282           | 0.400115405    |
| Spirochaetes     | 7.28                  | 0.400320178    |
